# Supplementary material
Source: PubMed Central journal article supplement (PMC3097126)
Supplement: NIHMS166527-supplement-1_si_001.pdf [file NIHMS166527-supplement-1_si_001.pdf]

# Supporting Information

## Ruthenium Olefin Metathesis Catalysts Bearing Carbohydrate-Based N-Heterocyclic Carbenes

Benjamin K. Keitz and Robert H. Grubbs

*Contribution from the Arnold and Mabel Beckman Laboratory of Chemical Synthesis, Division of Chemistry and Chemical Engineering, California Institute of Technology, Pasadena, California 91125*

### Contents

|                                                             |         |
|-------------------------------------------------------------|---------|
| General Information.....                                    | S2      |
| Synthesis of <b>7b</b> , <b>8a/b</b> .....                  | S3-S5   |
| Representative procedures for ROMP, RCM, CM, and AROCM..... | S5-S6   |
| NMR Data for <b>8a</b> .....                                | S6-S20  |
| NMR Data for <b>8b</b> .....                                | S21-S28 |
| Magnetization Transfer Experiment.....                      | S29     |
| Line Shape Analysis.....                                    | S30-S39 |
| References.....                                             | S39     |

## General Information.

All reactions were carried out in dry glassware under an argon atmosphere using standard Schlenk techniques or in a Vacuum Atmospheres Glovebox under a nitrogen atmosphere unless otherwise specified. All solvents were purified by passage through solvent purification columns and further degassed with argon.<sup>1</sup> NMR solvents were dried over CaH<sub>2</sub> and vacuum transferred to a dry Schlenk flask and subsequently degassed with argon. Commercially available reagents were used as received unless otherwise noted. Silica gel used for the purification of organometallic compounds was obtained from TSI Scientific, Cambridge, MA (60 Å, pH 6.5-7.0).

2D-NMR experiments were conducted on a Varian 600 MHz spectrometer equipped with a Triax (<sup>1</sup>H, <sup>13</sup>C, <sup>15</sup>N) probe while VT and kinetic experiments were conducted on a Varian 500 MHz spectrometer equipped with an AutoX probe. Accurate temperature measurements of the NMR probe were obtained using a thermocouple connected to a multimeter with the probe immersed in an NMR tube containing toluene. Experiments and pulse sequences from Varian's Chempack 4 software were used without modification except for changes in the number of FIDs and scans per FID. Reaction conversions were obtained by comparing the integral values of starting material and product, no internal standard was used. Chemical shifts are reported in ppm downfield from Me<sub>4</sub>Si by using the residual solvent peak as an internal standard. Spectra were analyzed and processed using MestReNova Ver. 5.2.5 – 4119.<sup>2</sup>

Gas chromatography data were obtained using an Agilent 6850 FID gas chromatograph equipped with a DB-Wax Polyethylene Glycol capillary column (J&W Scientific). Response factors were calculated for all relevant compounds before analysis. Enantiomeric excess was determined using an Agilent 1100 series HPLC equipped with Chiracel AD, OD-H, and AS

columns. The retention time of all compounds analyzed has been previously reported<sup>3</sup> but was also compared to authentic racemic samples. High-resolution mass spectrometry (HRMS) data was obtained on a JEOL MSRoute mass spectrometer using FAB+ ionization.

Compounds **6a**<sup>4</sup>, **6b**<sup>4</sup>, and **7a**<sup>5</sup> were prepared according to literature procedures from commercially available precursors.

### Synthesis of **7b**.

Mesityl imidazole<sup>6</sup> (1.06 g, 5.67 mmol), **6b** (2.57 g, 6.24 mmol), and AgOTf (1.60 g, 6.24 mmol) were placed in a dry 100 ml RB flask under argon and dissolved in 30 ml of dry MeCN. The RB was shielded from light and heated to 50 °C for 16 h. The reaction was cooled to 25 °C and the solution filtered through a pad of celite washing with MeCN then concentrated *in vacuo*. The resulting residue was dissolved in CH<sub>2</sub>Cl<sub>2</sub> and MTBE was added until the solution became slightly cloudy. After cooling to -5 °C, an oily residue crashed out. The supernatant was removed and the oil was triturated with cold hexanes and concentrated to a light brown powder (1.8 g, 47%). **5b** was recovered as a 1.3:1 mixture of β:α anomers <sup>1</sup>H NMR (CDCl<sub>3</sub>, 300 MHz): δ 9.39 (s, 1H), 8.69 (s, 1H), 7.91 (s, 1H), 7.77 (s, 1H), 7.31 (s, 1H), 7.18 (s, 1H), 7.02 (s, 4H), 6.37 (m, 1H), 5.57 (m, 1H), 5.36 (m, 3H), 4.48 (t, J = 6.18 Hz, 1H), 4.19-4.03 (m, 4H), 2.18-1.97 (m, 42H).

### Synthesis of **8a**.

In a glovebox, a 100 ml RB was charged with **1** (0.497 g, 0.604 mmol), **7a** (0.604 g, 0.906 mmol), and NaO<sup>t</sup>Bu (0.087 g, 0.906 mmol). 50 ml of dry THF was added and the reaction was stirred for 1 h at 25 °C after which it was removed from the glovebox and conc. *in vacuo*. The residue was dissolved in a minimal amount of CH<sub>2</sub>Cl<sub>2</sub>, loaded onto a column of TSI silica gel,

and eluted with 10% diethyl ether/pentane to first collect excess **1** as a dark purple band, followed by 30% ether/pentane, and finally 60% ether/pentane until a dark pink/red band was collected. After concentration of the relevant fractions, a dark pink residue was obtained which could be lyophilized from benzene to yield **8a** (208 mg, 33%) as a dark pink powder. <sup>1</sup>H NMR (C<sub>6</sub>D<sub>6</sub>, 600 MHz, major isomer): δ 19.74 (s, 1H), 8.4-7.8 (br s, 2H), 7.10 (d, J = 1.8 Hz, 1H), 6.95 (m, 3H), 6.31 (br s, 1H), 6.03 (d, J = 1.8 Hz, 1H), 5.98 (br s, 1H), 5.94 (t, J = 9 Hz, 1H), 5.88 (t, J = 9.6 Hz, 1H), 5.57 (t, J = 9.6 Hz, 1H), 4.39 (m, 2H), 4.26 (ad, J = 10.8 Hz, 1H), 2.53 (m, 3H), 2.23 (s, 6H), 1.98 (br s, 3H), 1.88 (br s, 6H), 1.80 (br s, 12H), 1.73 (m, 9H), 1.59 (m, 6H), 1.23 (m, 9H). <sup>13</sup>C NMR (151 MHz, C<sub>6</sub>D<sub>6</sub>) δ 298.0, 192.6, 170.39, 170.22, 169.94, 152.44, 138.70, 137.03, 136.86, 136.51, 129.46, 129.14, 128.90, 124.55, 124.54, 120.36, 120.34, 87.17, 75.50, 74.74, 71.13, 69.30, 62.00, 33.17, 33.06, 30.49, 28.52, 28.49, 28.46, 28.43, 27.24, 21.42, 21.31, 20.94, 20.55, 20.53, 18.97, 18.69. <sup>31</sup>P NMR (202 MHz, C<sub>6</sub>D<sub>6</sub>) δ 30.86 (major), 28.17 (minor). HRMS (FAB+) Calculated: 1058.332, Experimental: 1058.329.

### Synthesis of **8b**.

An analogous procedure to that of **8a** was followed yielding **8b** (17%) as a 1.2:1 mixture of anomers. <sup>1</sup>H NMR (C<sub>6</sub>D<sub>6</sub>, 600 MHz, major isomer): δ 19.78 (s, 1H), 8.4-7.9 (br s, 4H), 7.46 (d, J = 1.56 Hz, 1H), 7.06 (d, J = 5.1 Hz, 1H), 6.95 (br t, J = 7.38 Hz, 2H), 6.76 (d, J = 3.54 Hz, 1H), 6.32 (br s, 1H), 6.27 (t, J = 9.48 Hz, 1H), 6.03 (d, J = 2.04 Hz, 1H), 6.00 (br s, 1H), 5.91 (d, J = 2.88 Hz, 1H), 5.82 (m, 1H), 5.71 (m, 1H), 5.67 (m, 1H), 5.63 (m, 1H), 4.64 (br t, J = 6.78 Hz, 1H), 4.38 (m, 1H), 4.22 (m, 1H), 4.17 (m, 1H), 4.10 (m, 2H), 2.54 (m, 6H), 2.26 (s, 6H), 1.98-1.55 (m, 77H), 1.24 (m, 15H). <sup>13</sup>C NMR (151 MHz, C<sub>6</sub>D<sub>6</sub>) δ 193.04, 170.52, 170.37, 170.35, 170.20, 170.13, 169.94, 169.92, 169.81, 168.82, 152.49, 138.71, 137.09, 136.88, 136.52, 129.46, 129.17, 128.66, 128.61, 128.53, 128.45, 128.37, 128.29, 128.21, 128.10, 124.60, 124.59, 120.54,

120.52, 92.94, 90.54, 87.65, 74.31, 72.66, 72.22, 71.67, 69.65, 68.86, 68.55, 68.25, 68.17, 68.03, 67.57, 67.51, 61.69, 61.47, 61.21, 33.08, 33.04, 32.97, 30.51, 30.49, 30.37, 30.15, 28.54, 28.51, 28.49, 28.44, 28.43, 27.60, 27.28, 27.16, 27.01, 21.58, 21.32, 20.73, 20.63, 20.53, 20.52, 20.49, 20.47, 20.43, 20.41, 20.39, 20.24, 20.18, 19.01, 18.67. <sup>31</sup>P NMR (121 MHz, C<sub>6</sub>D<sub>6</sub>) δ 31.19 (major), 28.53 (minor). HRMS (FAB+) Calculated: 1057.324, Experimental 1057.321.

#### **Representative procedure for ROMP/RCM kinetics.**

In a glovebox, catalyst **8a** (2.5 mg, 0.0024 mmol) was dissolved in CD<sub>2</sub>Cl<sub>2</sub> (0.8 ml) and placed in a NMR tube equipped with a rubber septum. The NMR tube was removed from the glovebox and COD (distilled prior to use) (30 μL, 0.24 mmol) was injected after which the tube was immediately placed in the spectrometer and a spectral array started by arraying the “pad” variable for Varian spectrometers.

#### **Representative procedure for CM Kinetics.**

Allyl benzene and *cis*-diacetoxybutene were distilled prior to use. In a glovebox, a scintillation vial was charged with allyl benzene (20 μL, 0.153 mmol), *cis*-diacetoxybutene (49 μL, 0.305 mmol), and tridecane standard (50 μL, 0.205 mmol). CH<sub>2</sub>Cl<sub>2</sub> (0.75 ml) was added followed by **8a** (4 mg, 0.004 mmol) as a solution in CH<sub>2</sub>Cl<sub>2</sub>. The vial was equipped with a septa top, removed from the glovebox and stirred under argon. Aliquots were removed via syringe at the specified time points and added to a GC vial containing a solution of ethyl vinyl ether in CH<sub>2</sub>Cl<sub>2</sub> in order to quench the catalyst. GC retention times were as follows (min): allyl benzene (10.87), tridecane (11.55), *cis*-diacetoxybutene (18.13), *trans*-diacetoxybutene (18.70), *cis*-**12** (21.27), *trans*-**12** (21.48), *trans*-homocoupled allyl benzene (24.09), *cis*-homocoupled allyl benzene (24.34).

#### **Representative procedure for AROCM.**

A 10 ml RB was dried and charged with the norbornene substrate (0.109 mmol), styrene (0.125 mL, 1.09 mmol) which had been passed through a small plug of silica gel, and dry toluene (2 mL). Catalyst **8a** (6 mg, 0.005 mmol) was injected as a solution in toluene and the reaction stirred at 40°C for 14 h. The solvent was evaporated and the remaining residue was purified by flash chromatography to yield the desired product. Chromatography and HPLC conditions for all compounds studied have been previously reported.<sup>3</sup>

### Spectroscopic characterization.

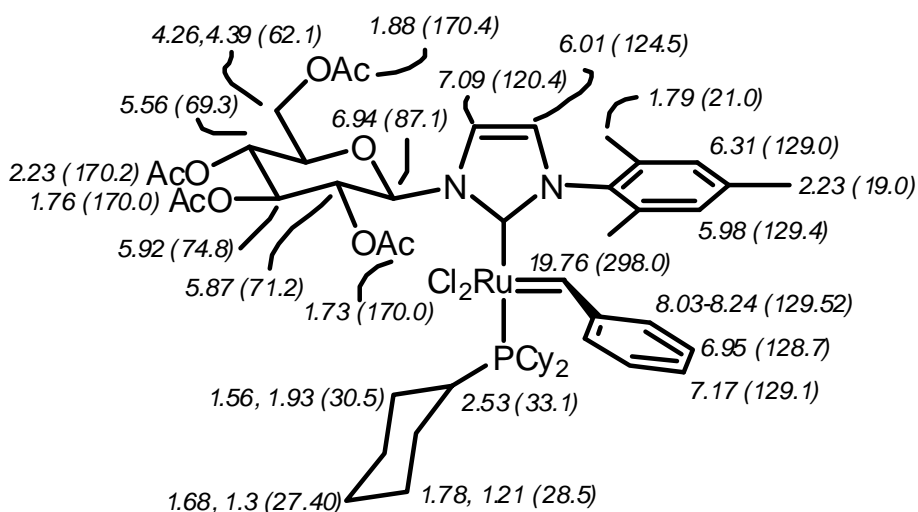

**Figure S1.**  $^1\text{H}$  ( $^{13}\text{C}$ ) assignments for major isomer of catalyst **8a** based on spectroscopic data.

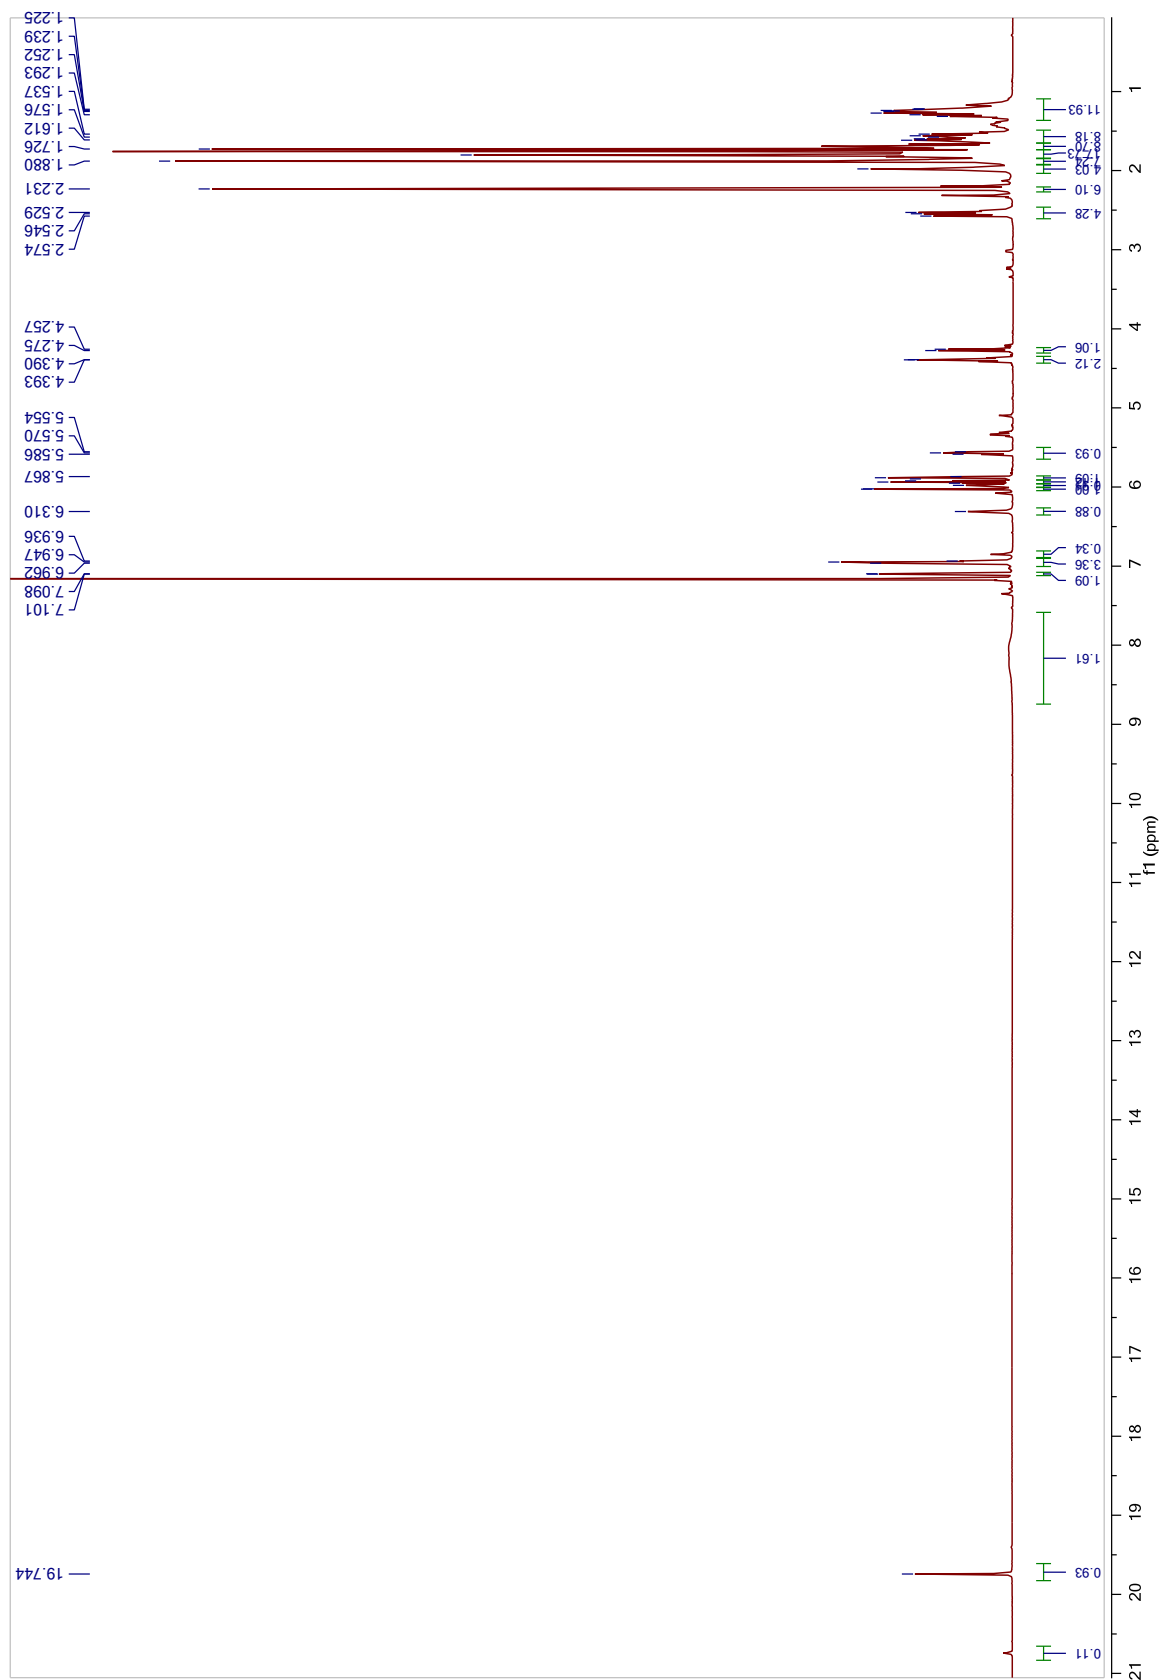

Figure S2.  $^1\text{H}$  NMR (600 MHz) spectrum of catalyst **8a** in  $\text{C}_6\text{D}_6$

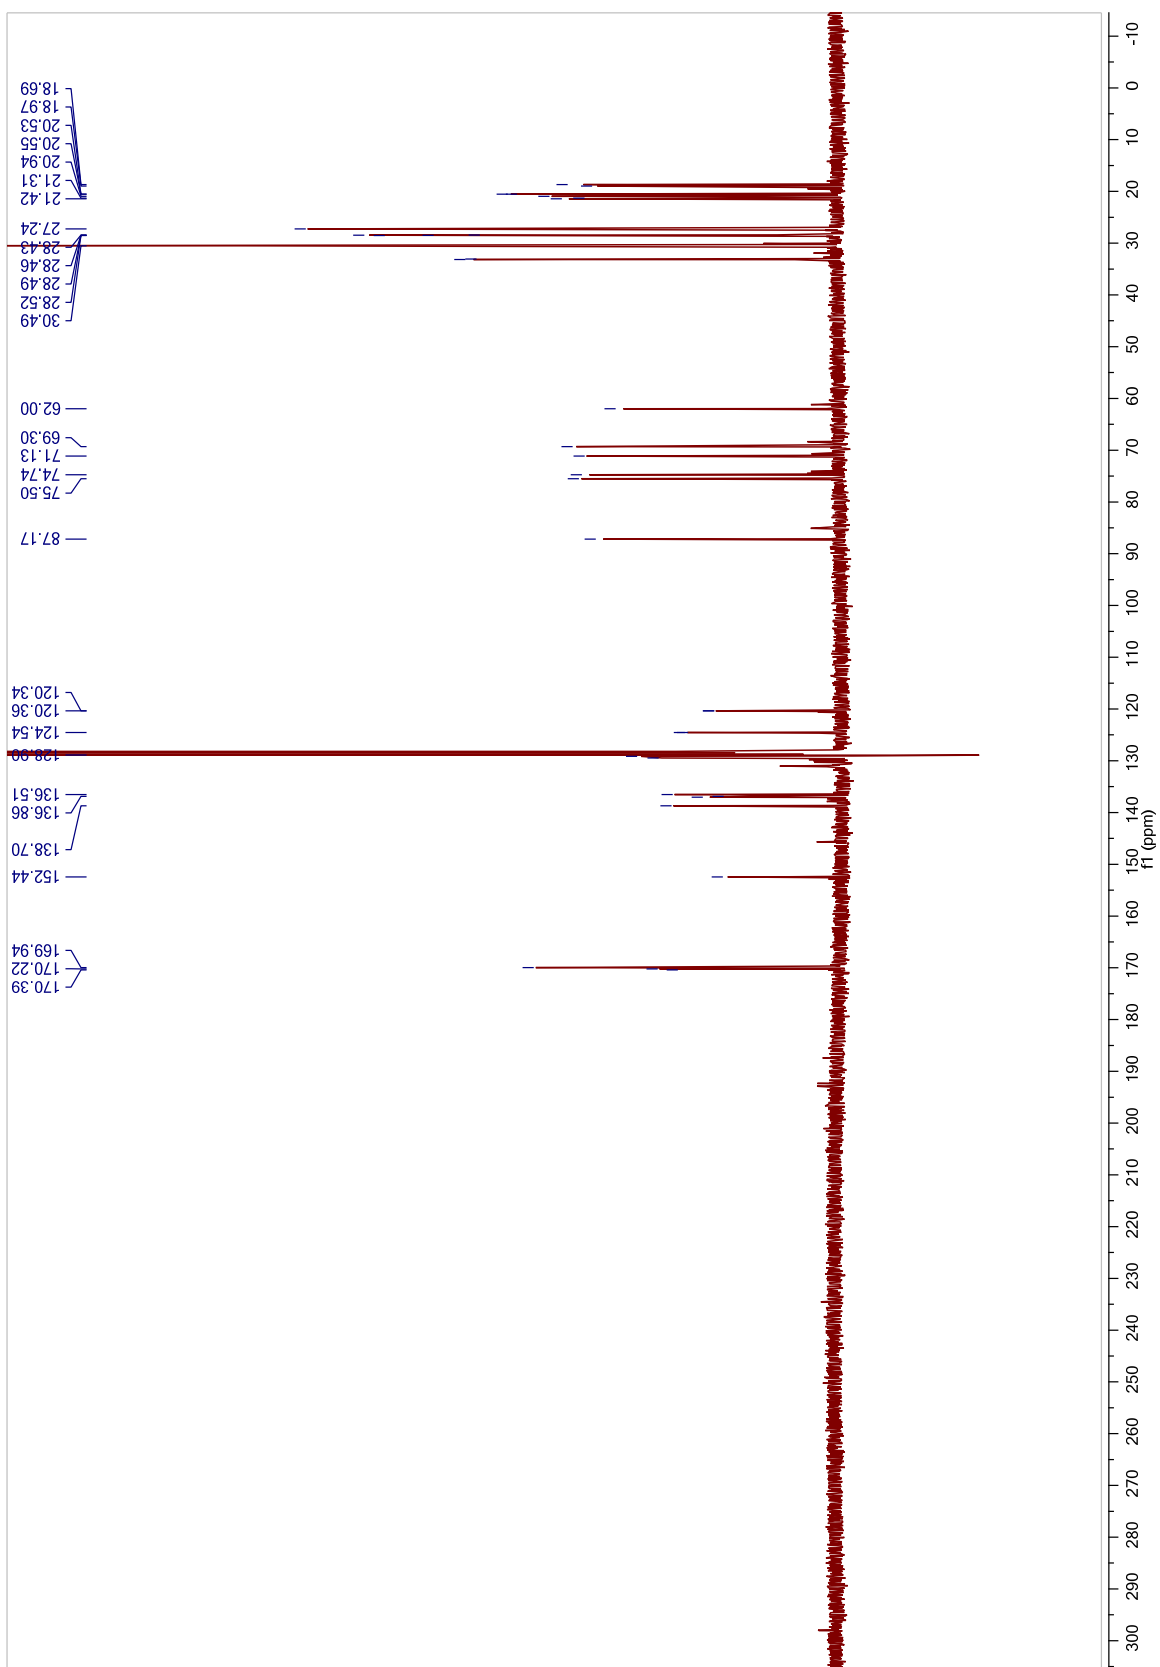

Figure S3.  $^{13}\text{C}$  NMR spectrum of catalyst **8a** in  $\text{C}_6\text{D}_6$ .



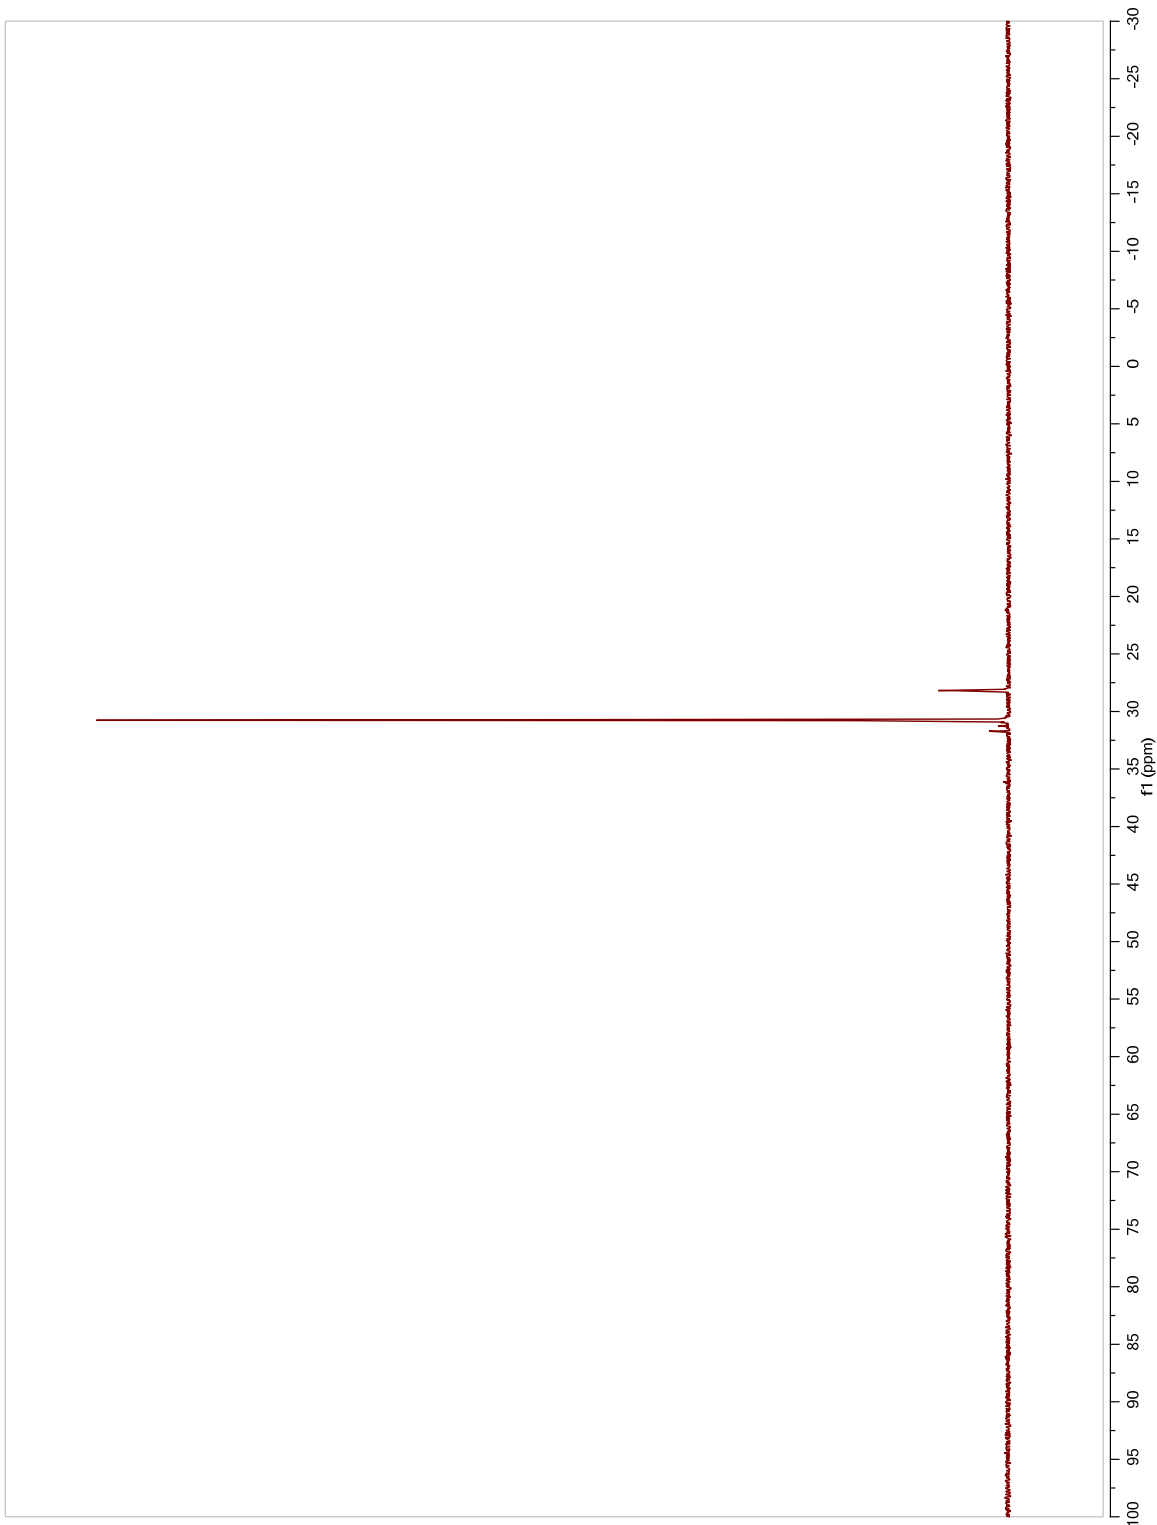

**Figure S4.**  $^{31}\text{P}$  NMR Spectrum of catalyst **8a** in  $\text{C}_6\text{D}_6$ .

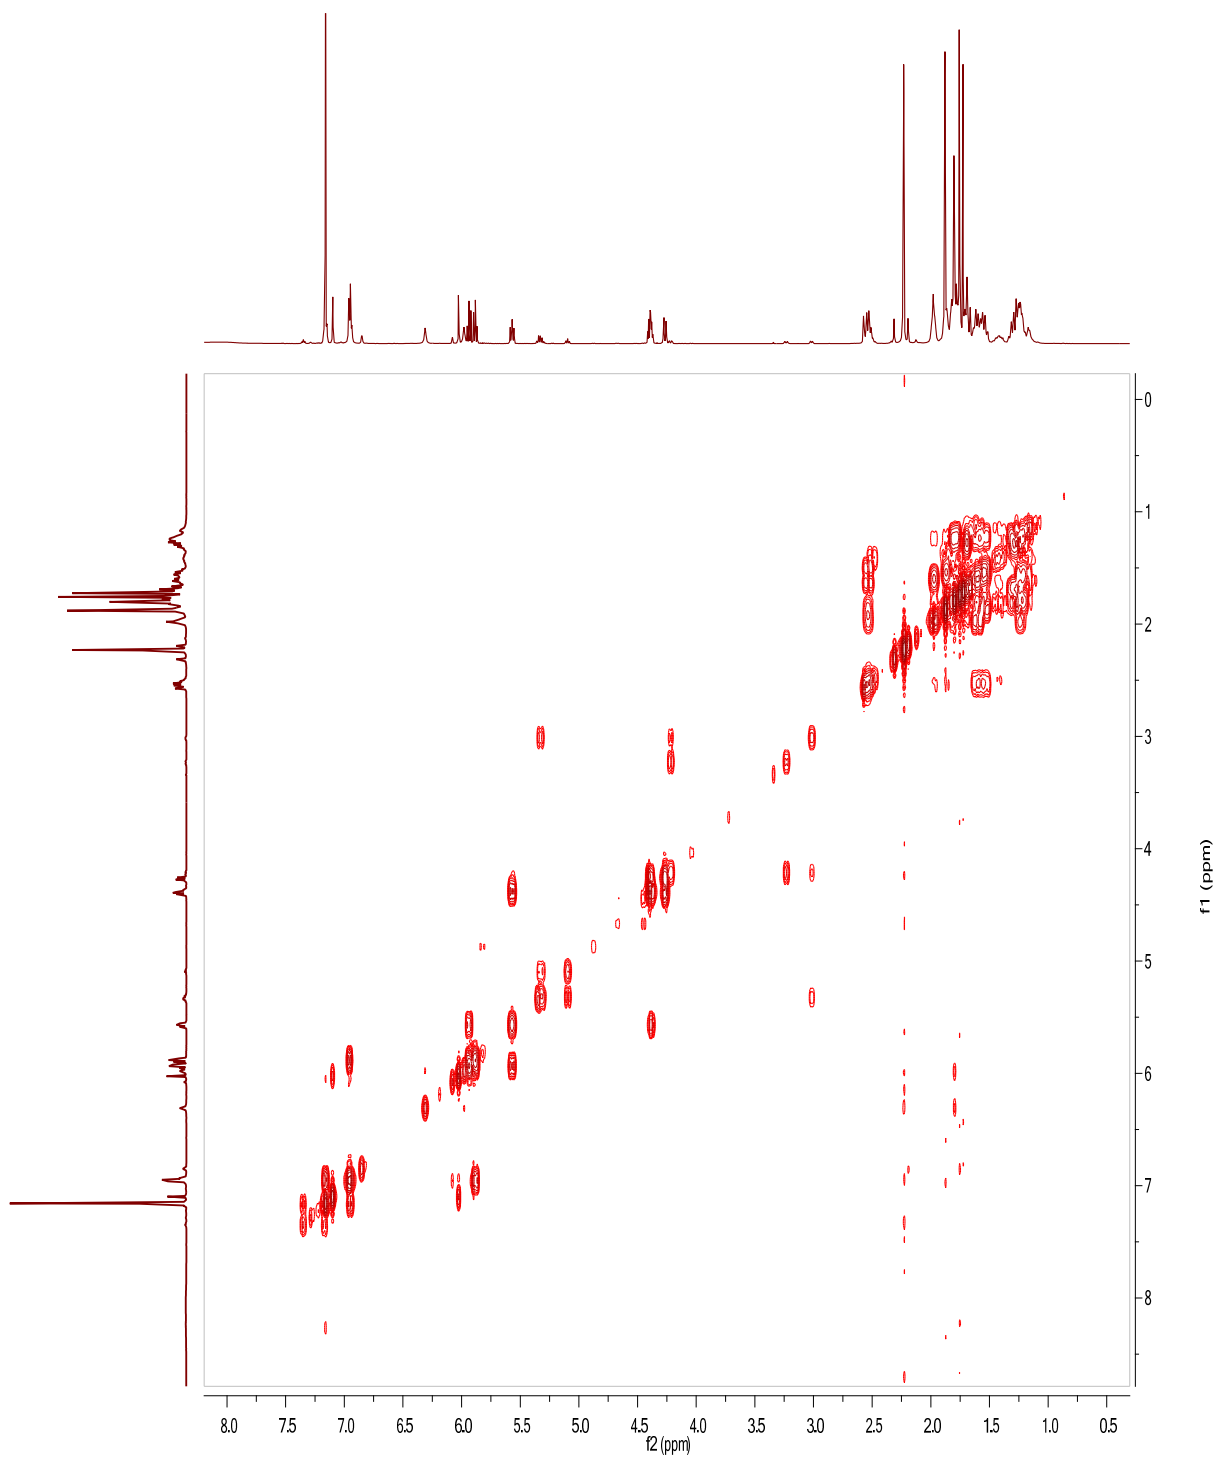

**Figure S5.** 600 MHz <sup>1</sup>H-<sup>1</sup>H gCOSY spectrum of **8a** in C<sub>6</sub>D<sub>6</sub> at 25 °C.

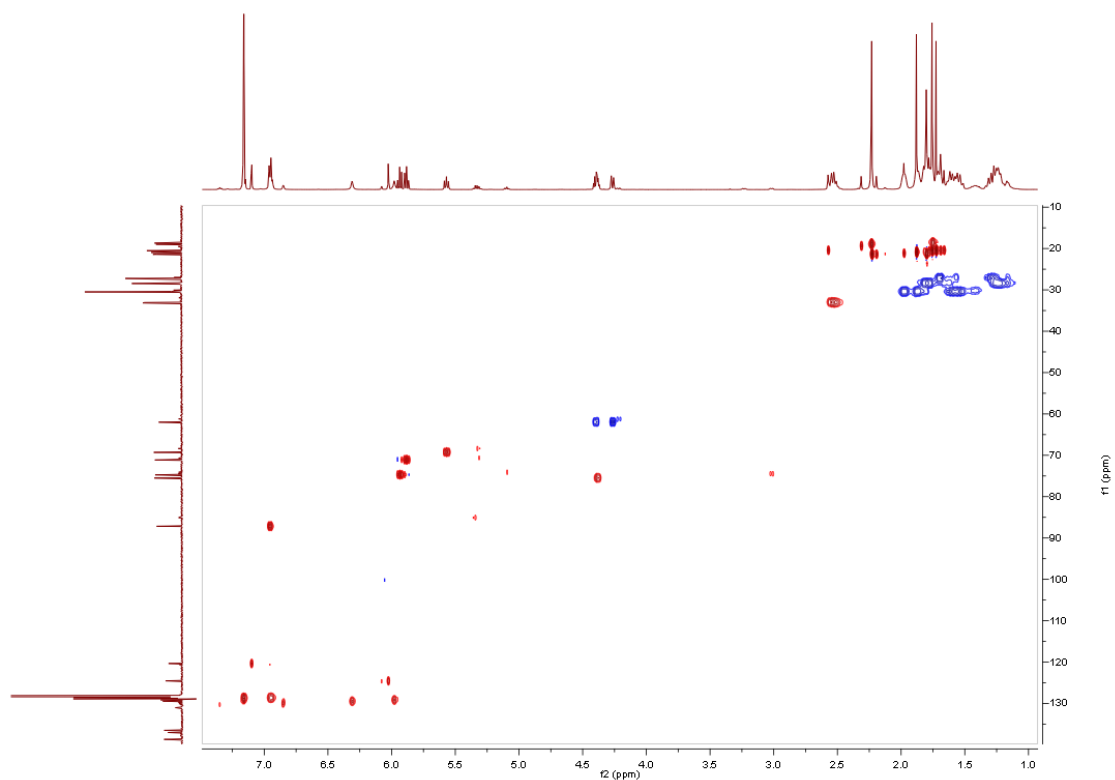

**Figure S6.** Upfield 600 MHz  $^1\text{H}$ - $^{13}\text{C}$  gHSQCad spectrum of **8a** in  $\text{C}_6\text{D}_6$  at 25 °C.

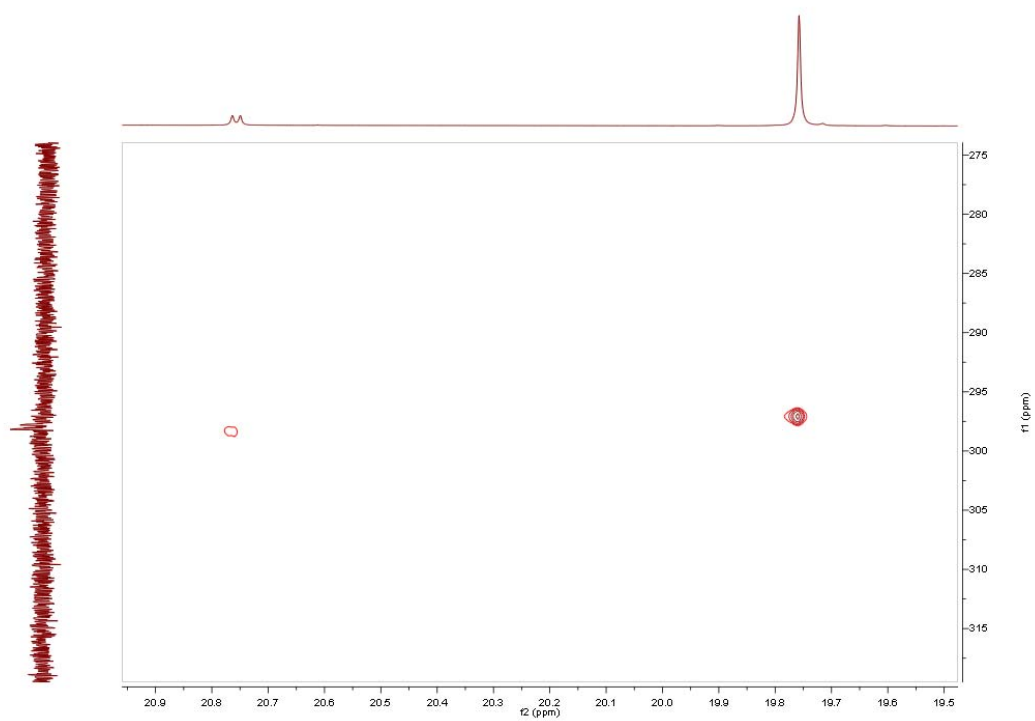

**Figure S7.** Downfield 600 MHz  $^1\text{H}$ - $^{13}\text{C}$  gHSQCad spectrum of **8a** in  $\text{C}_6\text{D}_6$  at 25 °C.

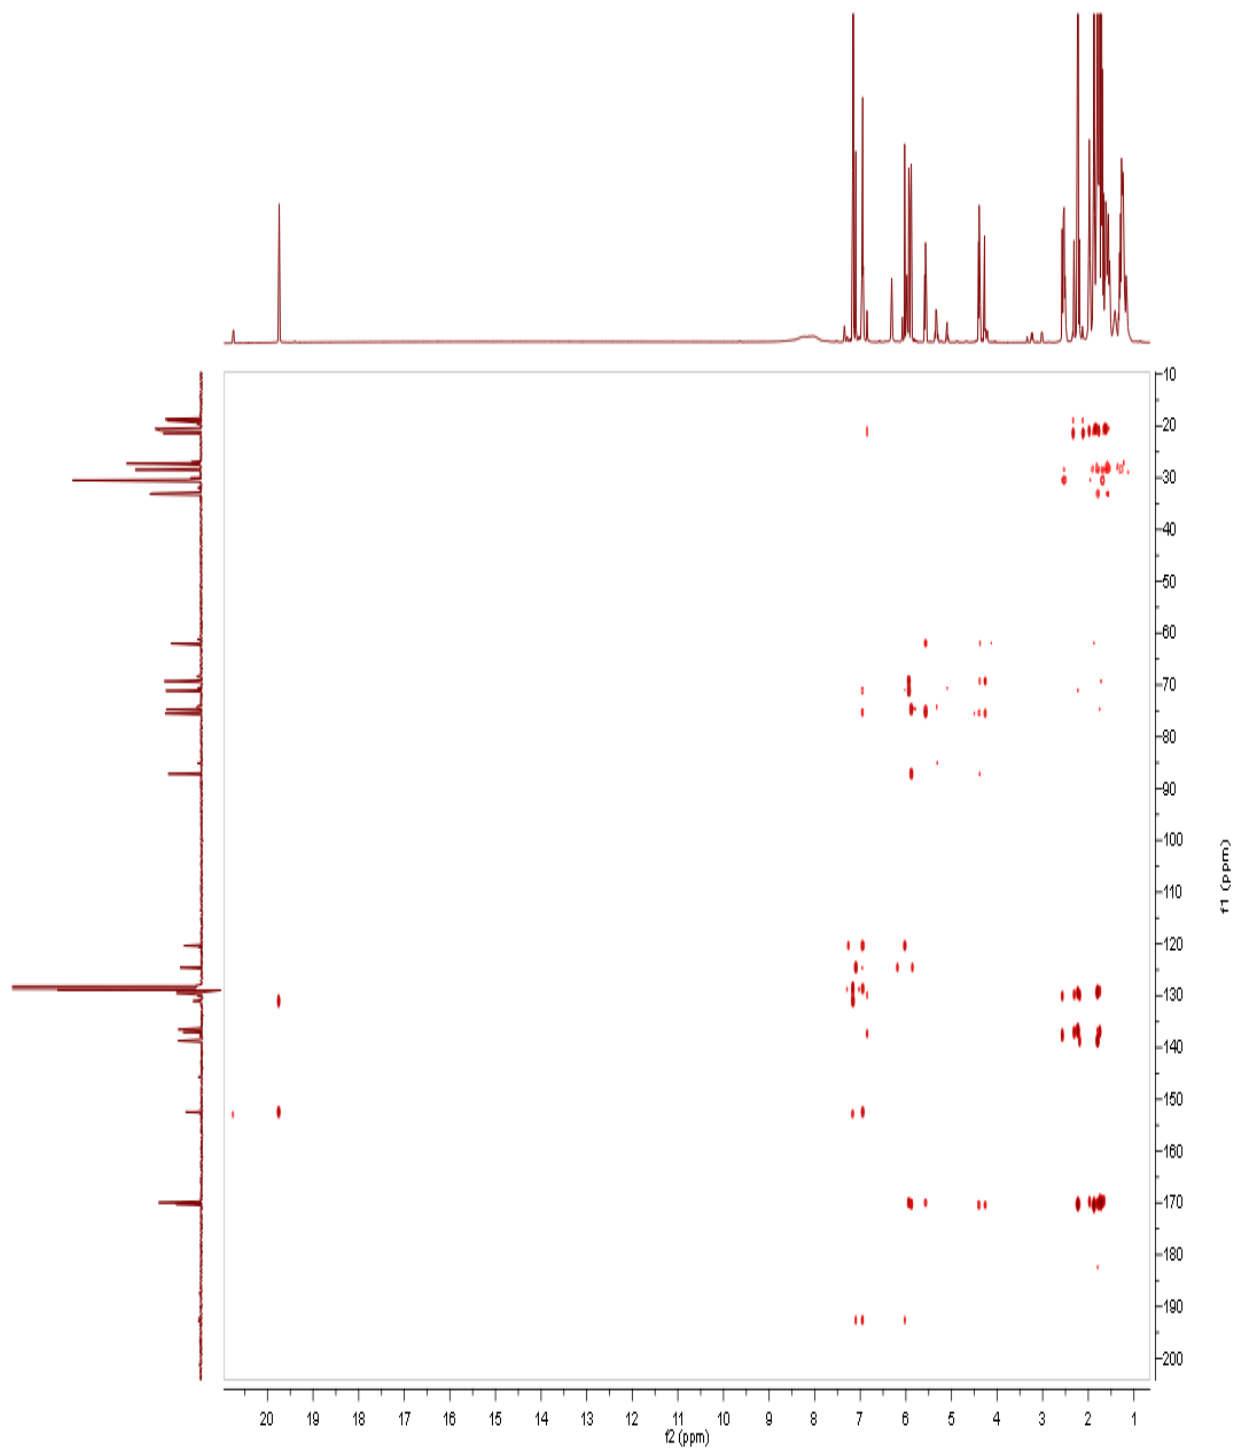

**Figure S8.** 600 MHz  $^1\text{H}$ - $^{13}\text{C}$  gHMBCad spectrum of **8a** in  $\text{C}_6\text{D}_6$  at 25 °C.

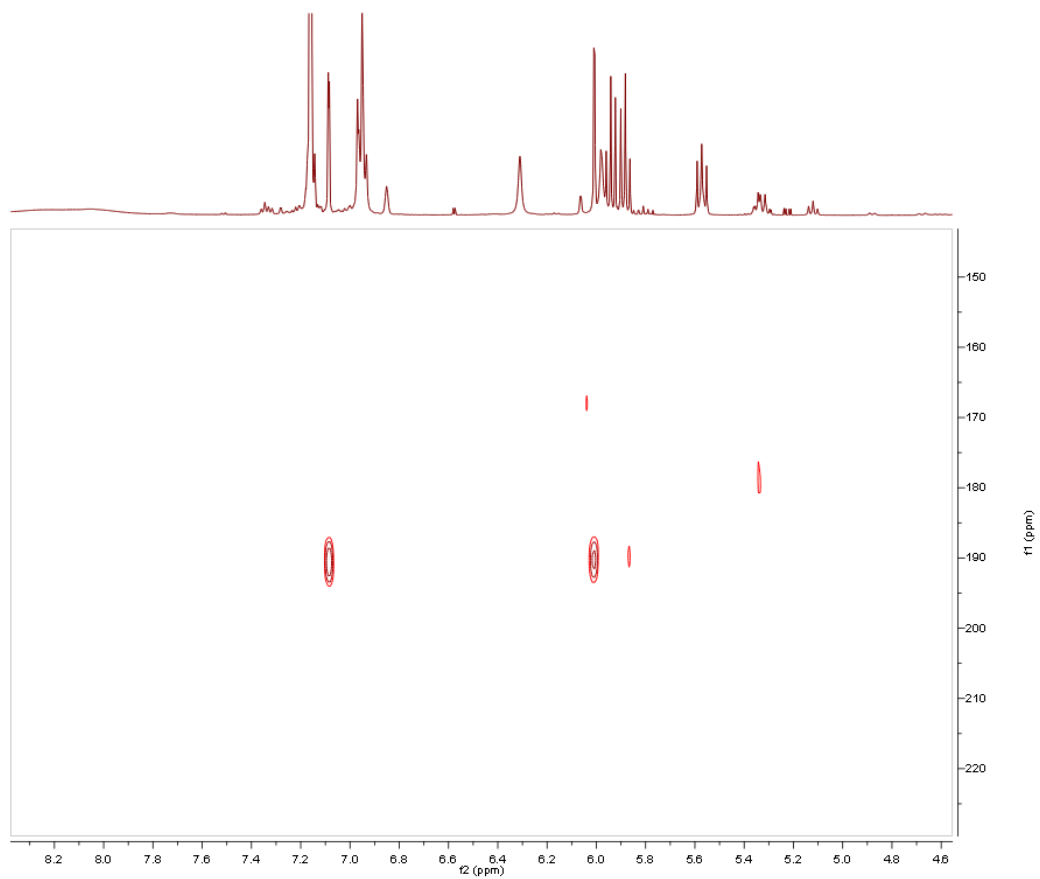

**Figure S9.** 600 MHz  $^1\text{H}$ - $^{15}\text{N}$  gHMBCad of **8a** in  $\text{C}_6\text{D}_6$  at 25  $^\circ\text{C}$ .

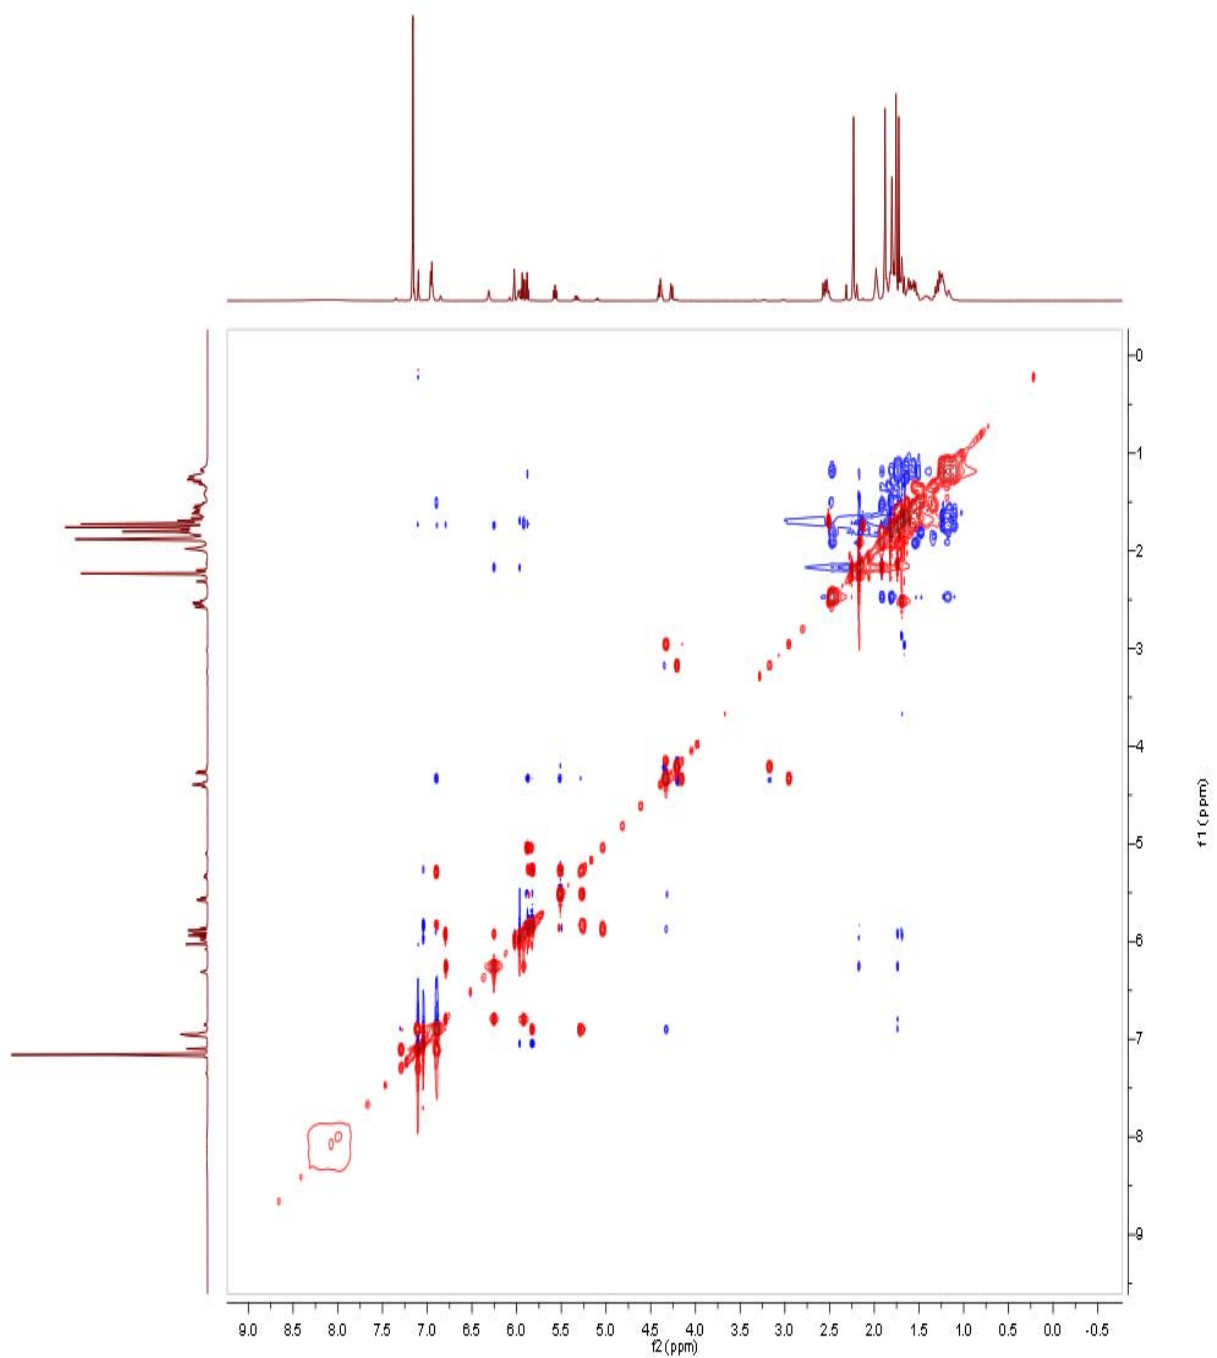

**Figure S10.** 600 MHz  $^1\text{H}$ - $^1\text{H}$  NOESY of **8a** in  $\text{C}_6\text{D}_6$  at 25 °C. Mixing time = 200 ms. Red peaks show chemical exchange, blue peaks show NOE.

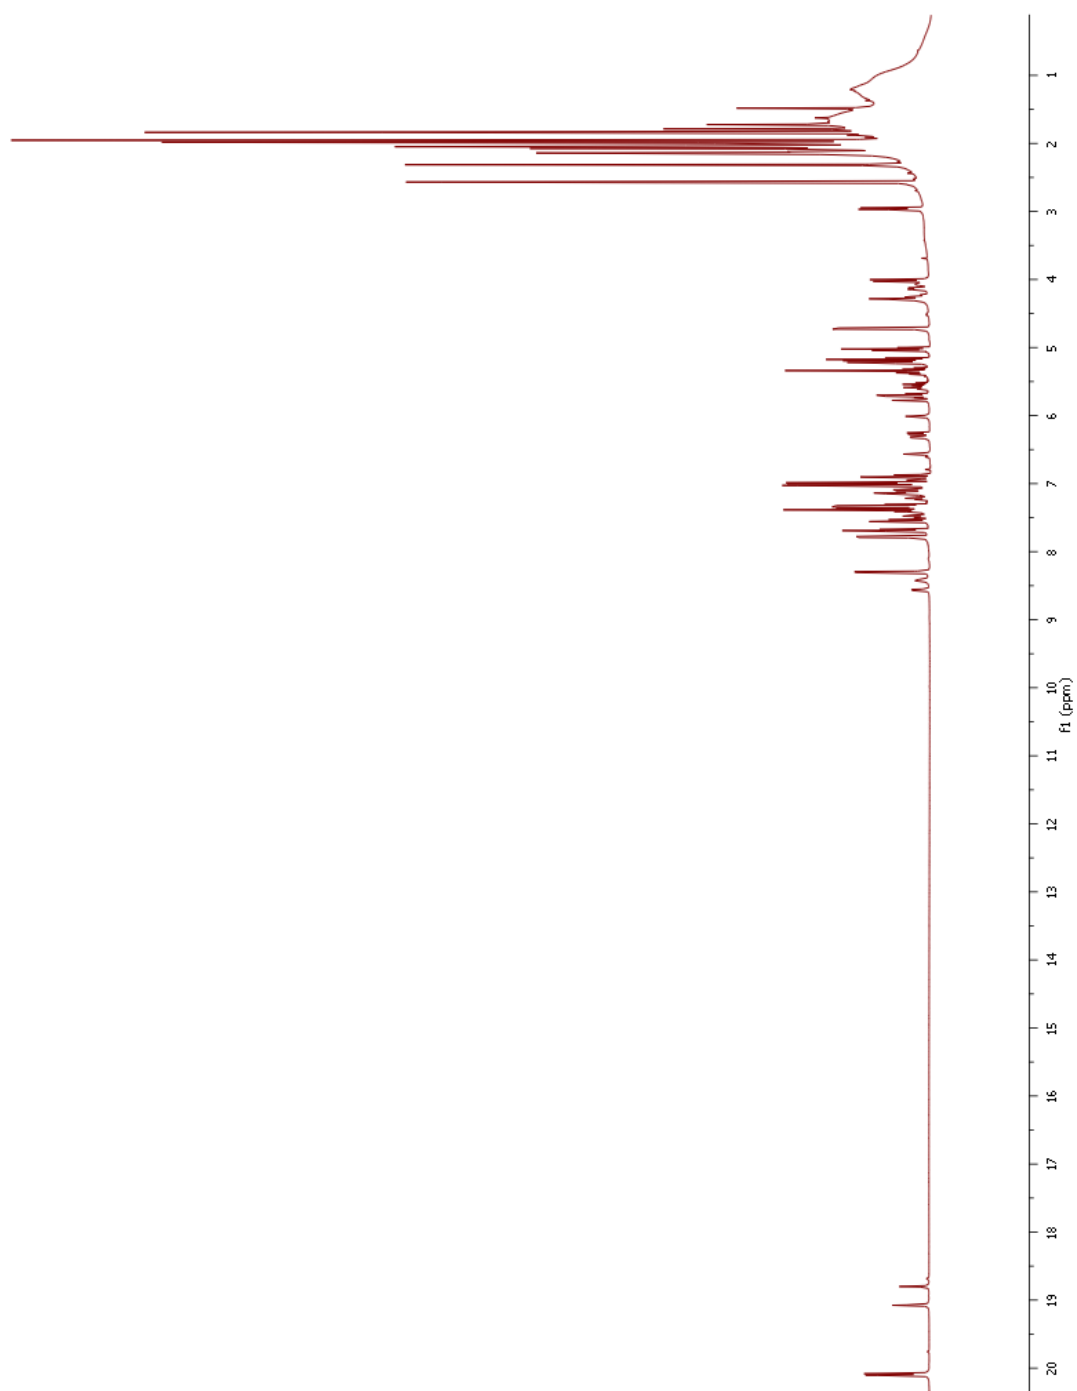

**Figure S11.** 500 MHz  $^1\text{H}$  NMR spectrum of **8a** in  $\text{CD}_2\text{Cl}_2$  at  $-75^\circ\text{C}$ .

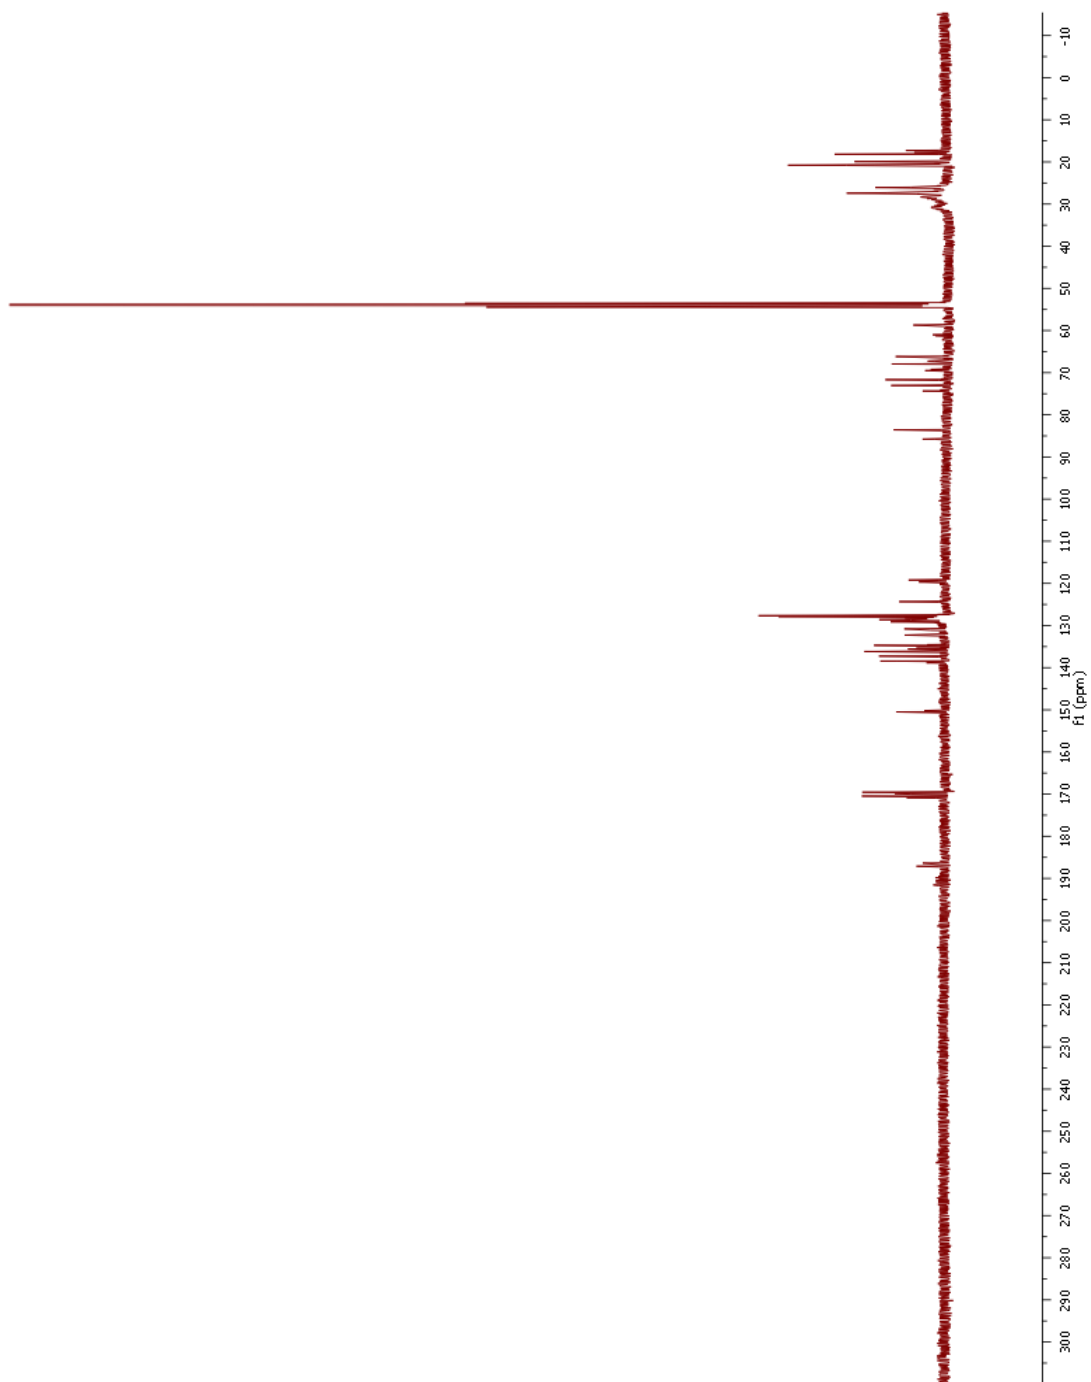

**Figure S12.** 500 MHz  $^{13}\text{C}$  NMR spectrum of **8a** in  $\text{CD}_2\text{Cl}_2$  at  $-75^\circ\text{C}$ .



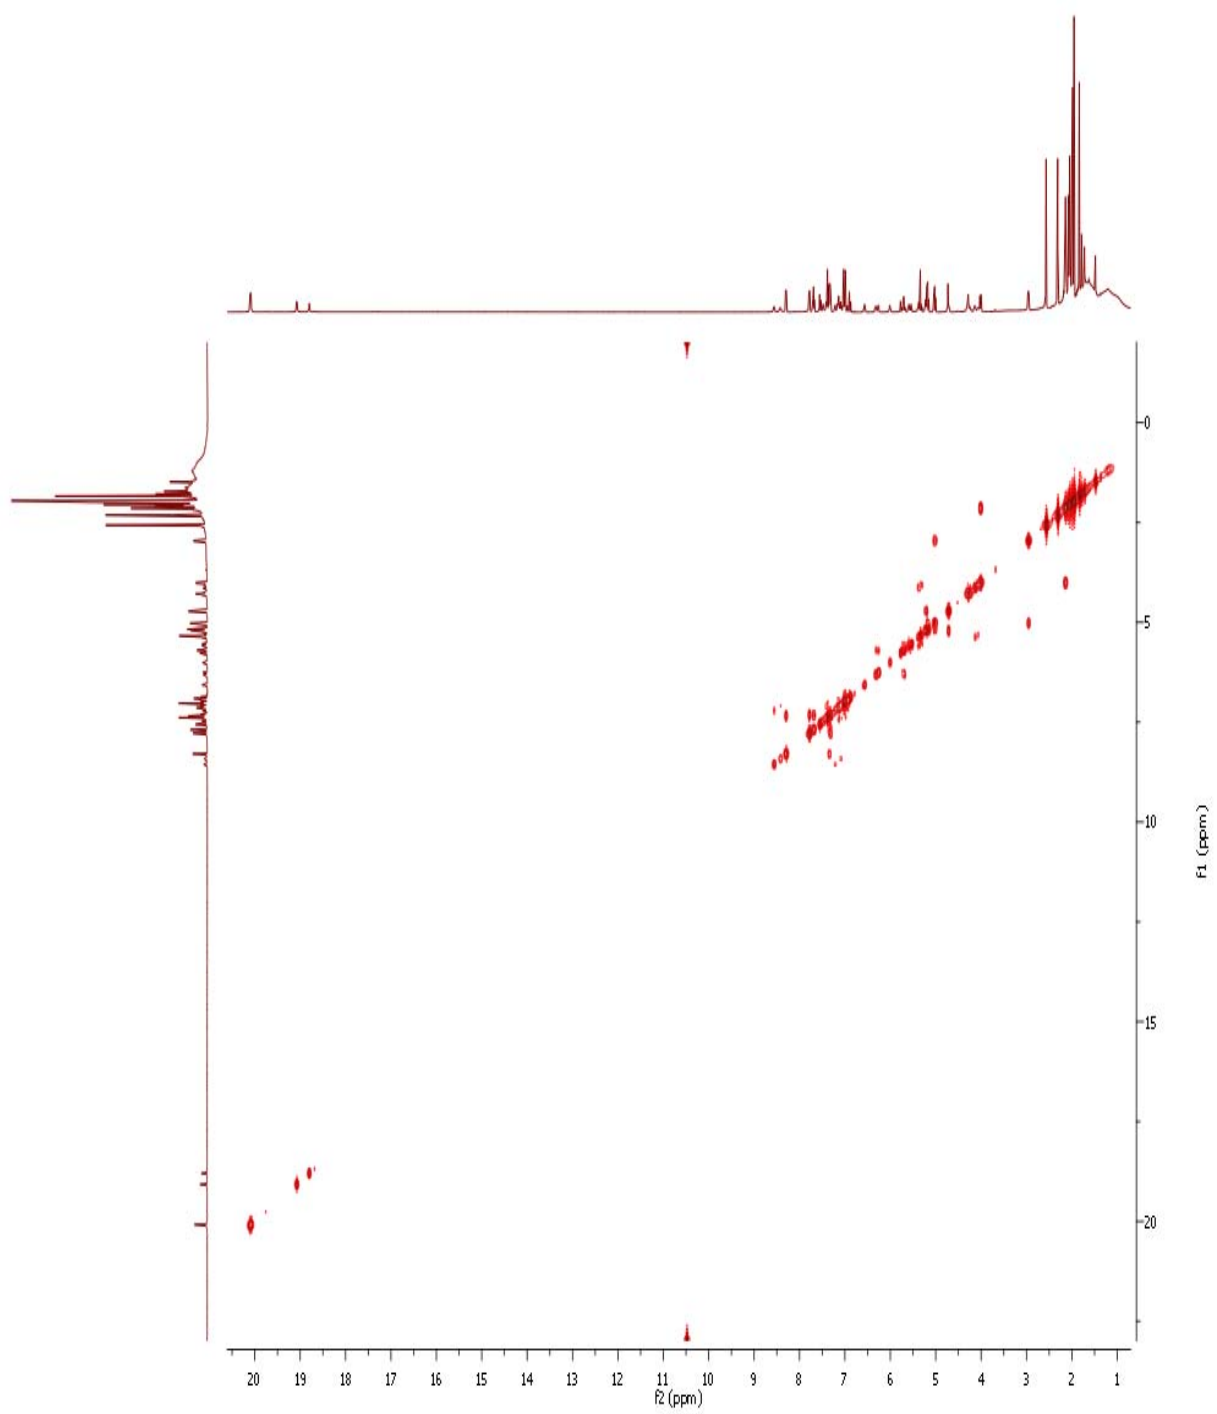

**Figure S13.** 500 MHz <sup>1</sup>H-<sup>1</sup>H gCOSY of **8a** in CH<sub>2</sub>Cl<sub>2</sub> at -75°C.

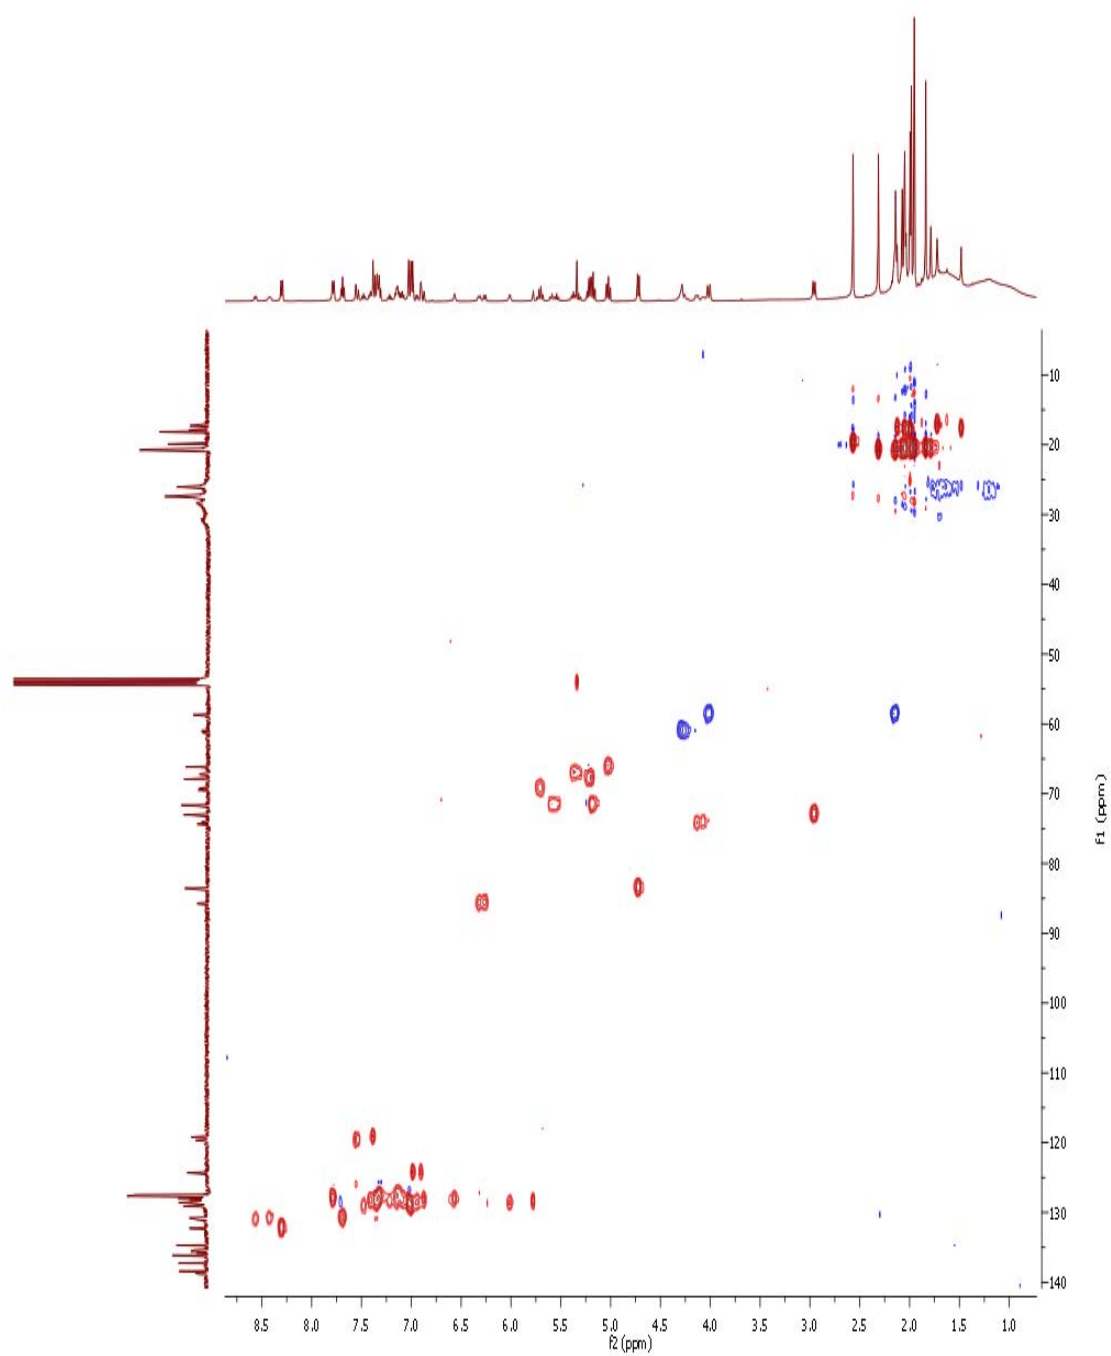

**Figure S14.** 500 MHz  $^1\text{H}$ - $^{13}\text{C}$  gHSQCad spectrum of **8a** in  $\text{C}_6\text{D}_6$  at  $-75^\circ\text{C}$ .

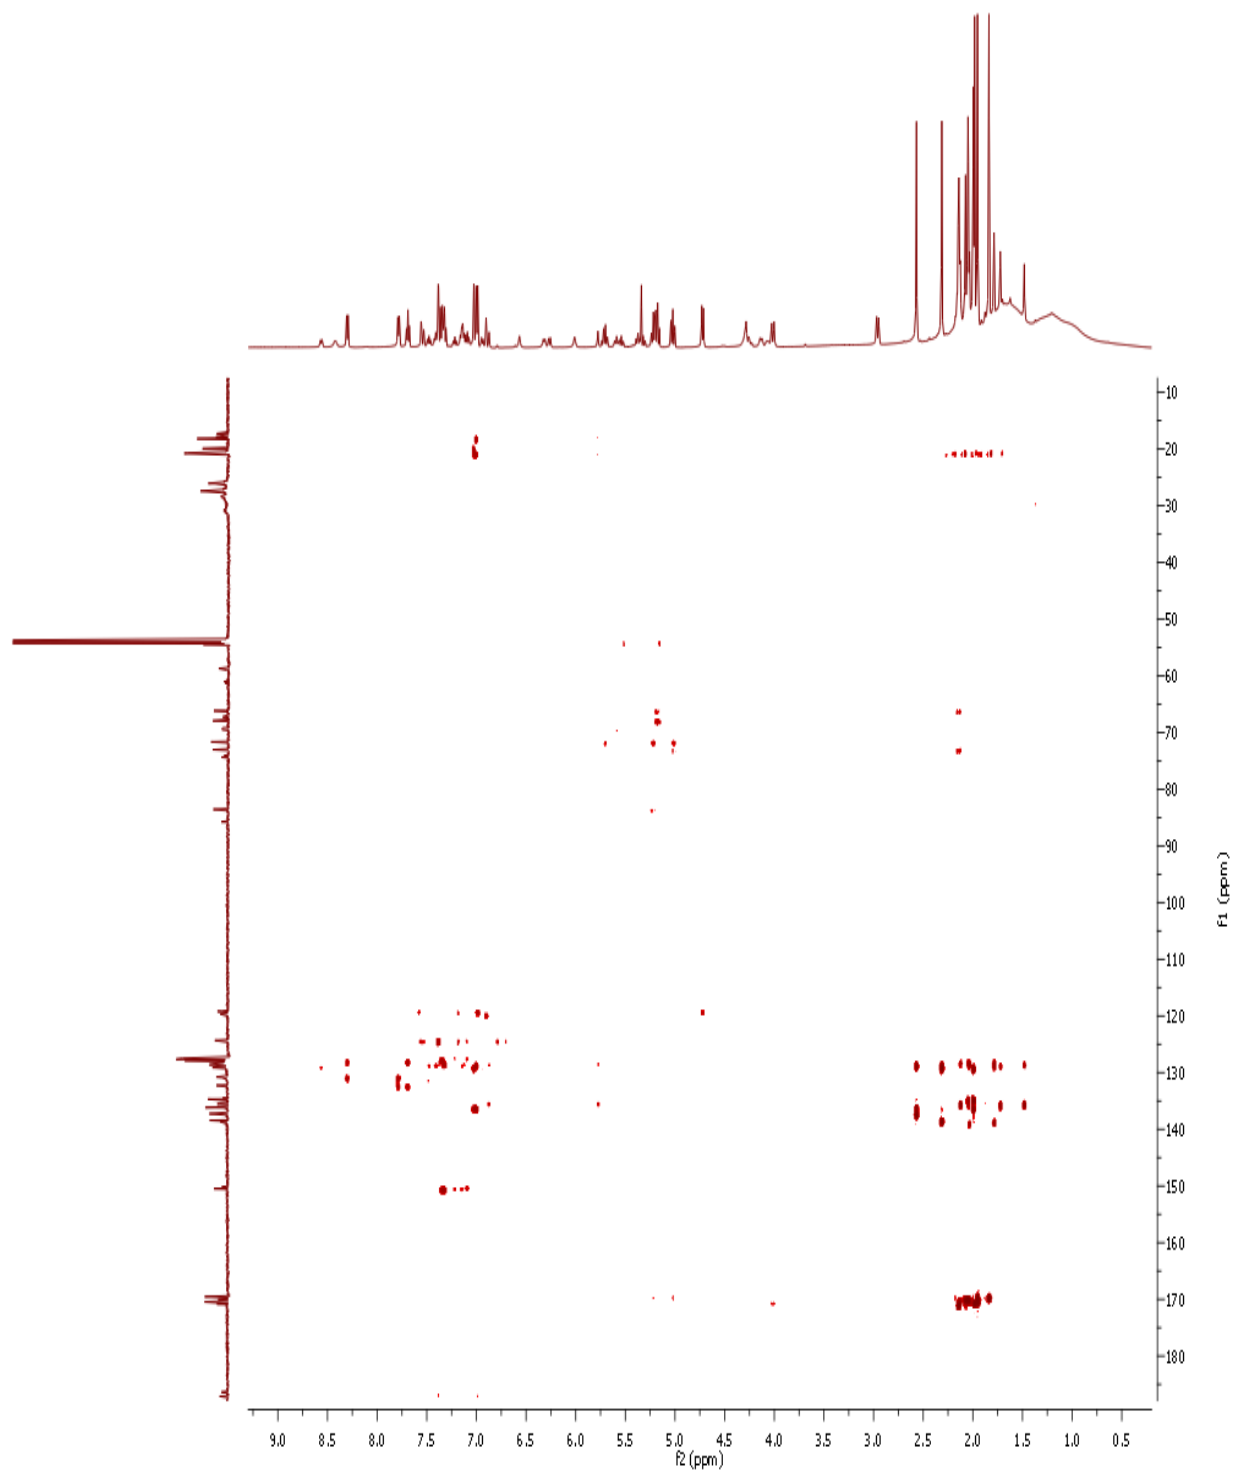

**Figure S15.** 500 MHz  $^1\text{H}$ - $^{13}\text{C}$  gHMBCad spectrum of **8a** in  $\text{C}_6\text{D}_6$  at  $-75^\circ\text{C}$ .

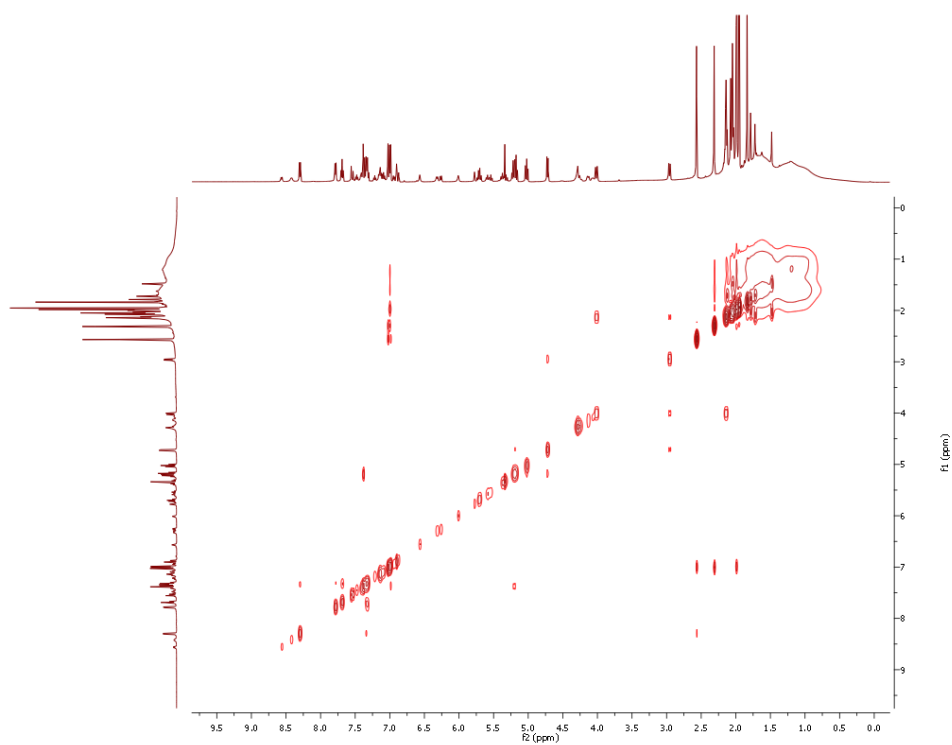

**Figure S16.** 500 MHz  $^1\text{H}$ - $^1\text{H}$  NOESY of **8a** in  $\text{C}_6\text{D}_6$  at  $-75^\circ\text{C}$ . Mixing time = 500 ms.

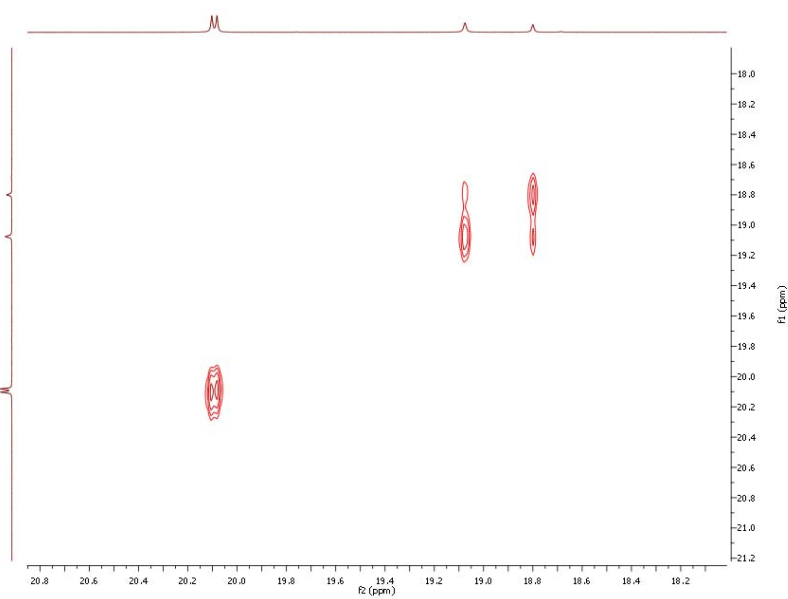

**Figure S17.** 500 MHz  $^1\text{H}$ - $^1\text{H}$  NOESY of **8a** in  $\text{C}_6\text{D}_6$  at  $-75^\circ\text{C}$ . Mixing time = 500 ms.



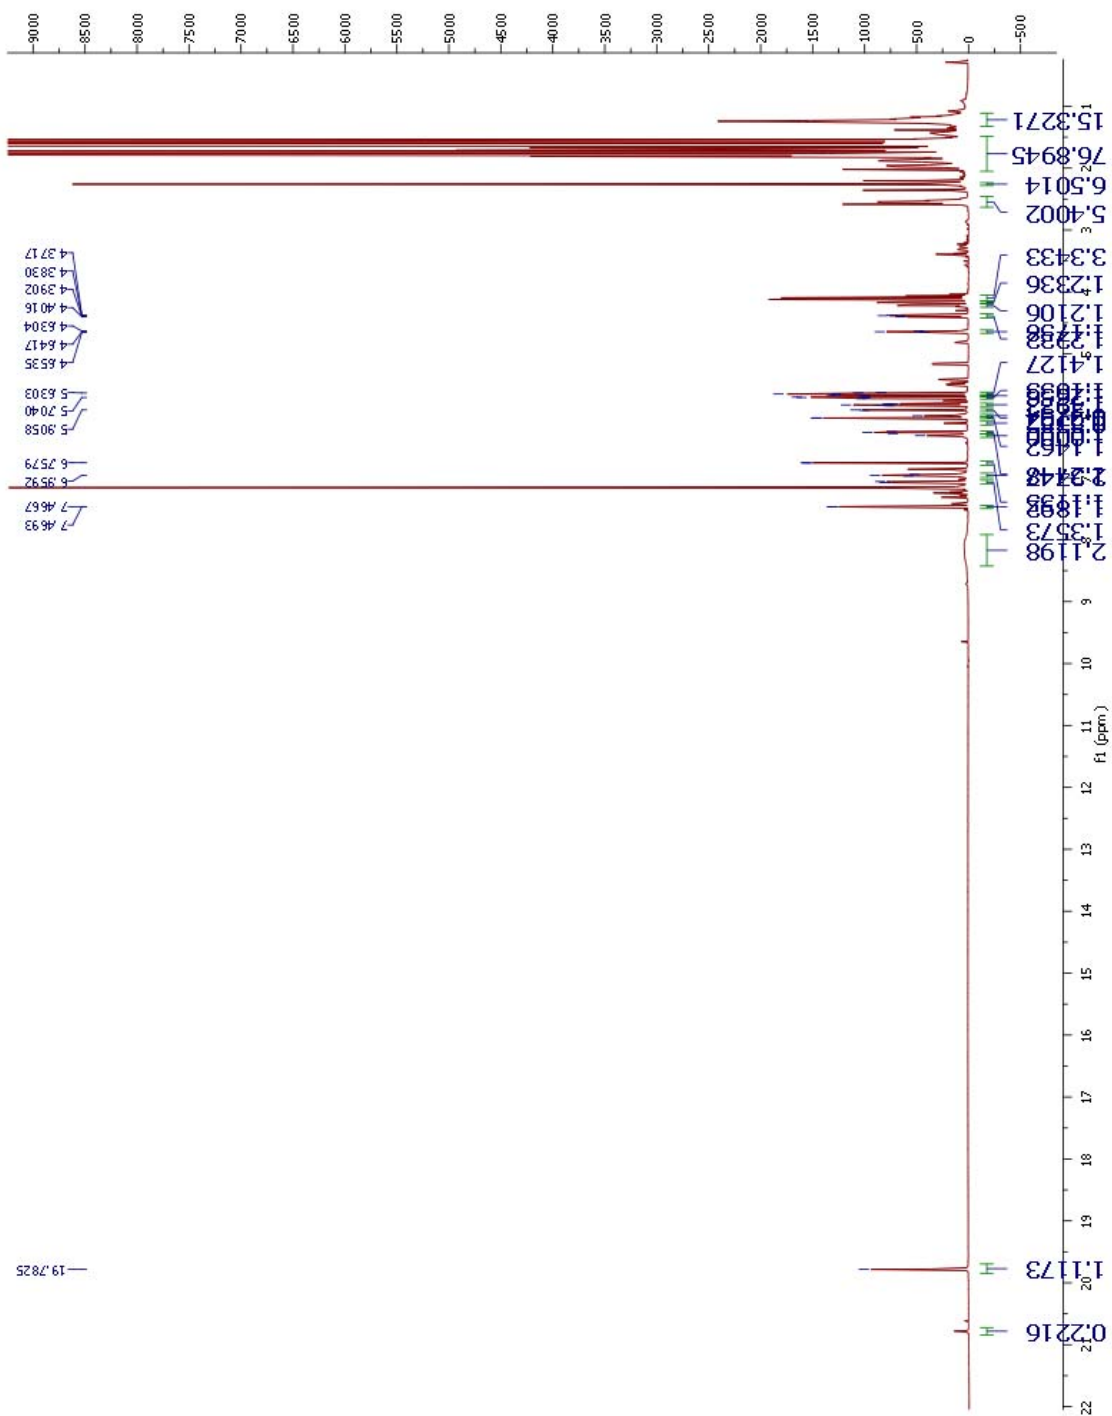

**Figure S19.** 600 MHz  $^1\text{H}$  NMR spectrum of **8b** in  $\text{C}_6\text{D}_6$  at 25 °C.

Figure S20.  $^{13}\text{C}$  NMR spectrum of **8b** in  $\text{C}_6\text{D}_6$  at 25  $^\circ\text{C}$ .

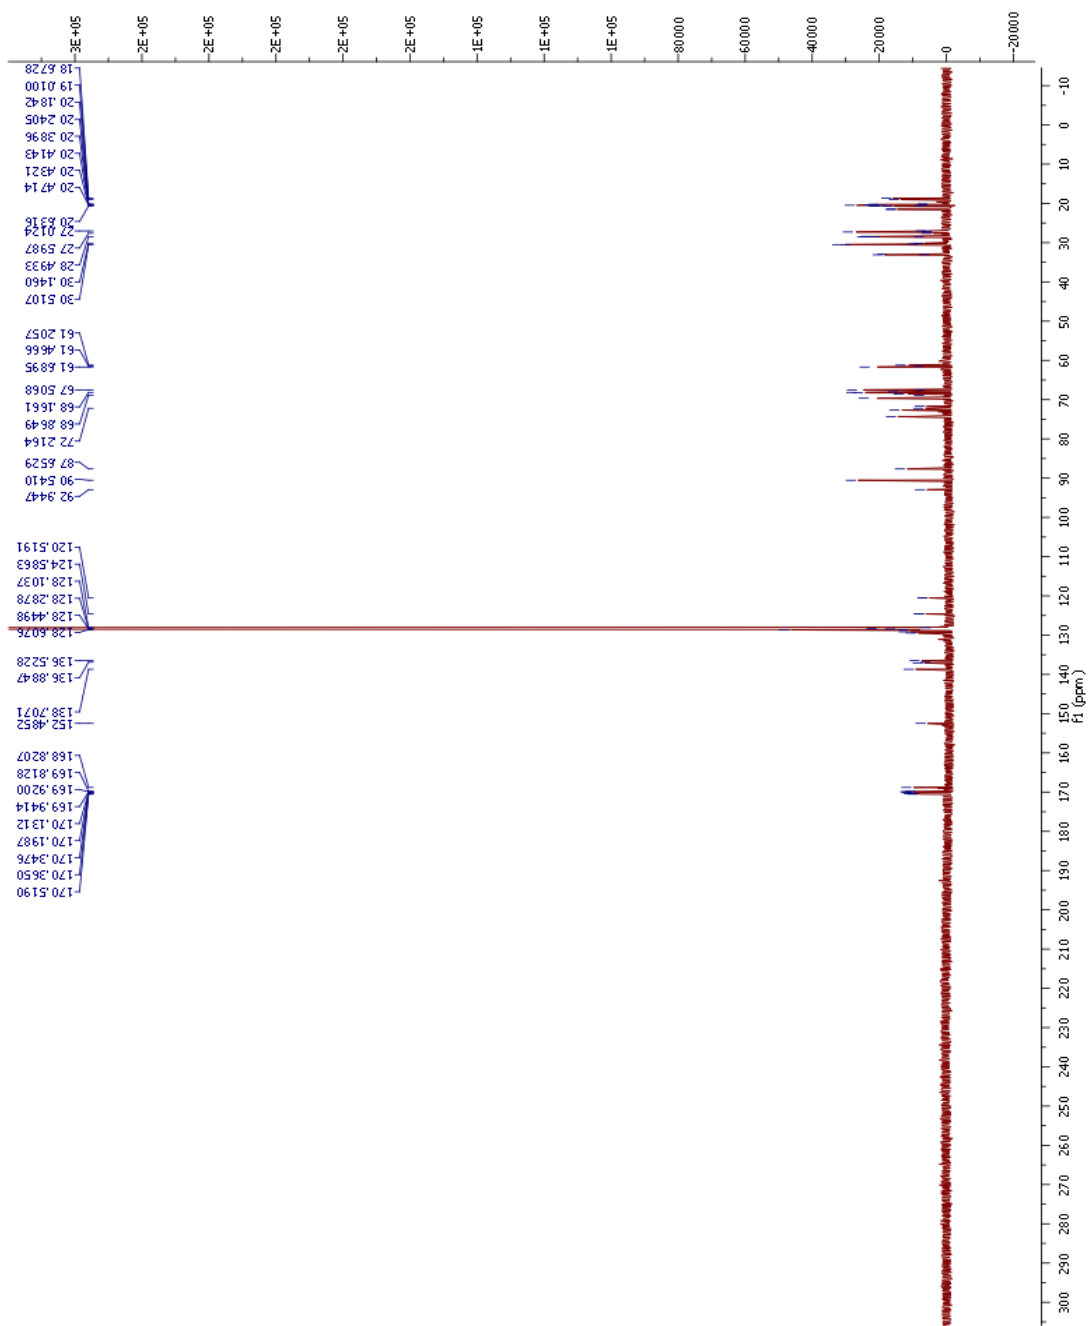

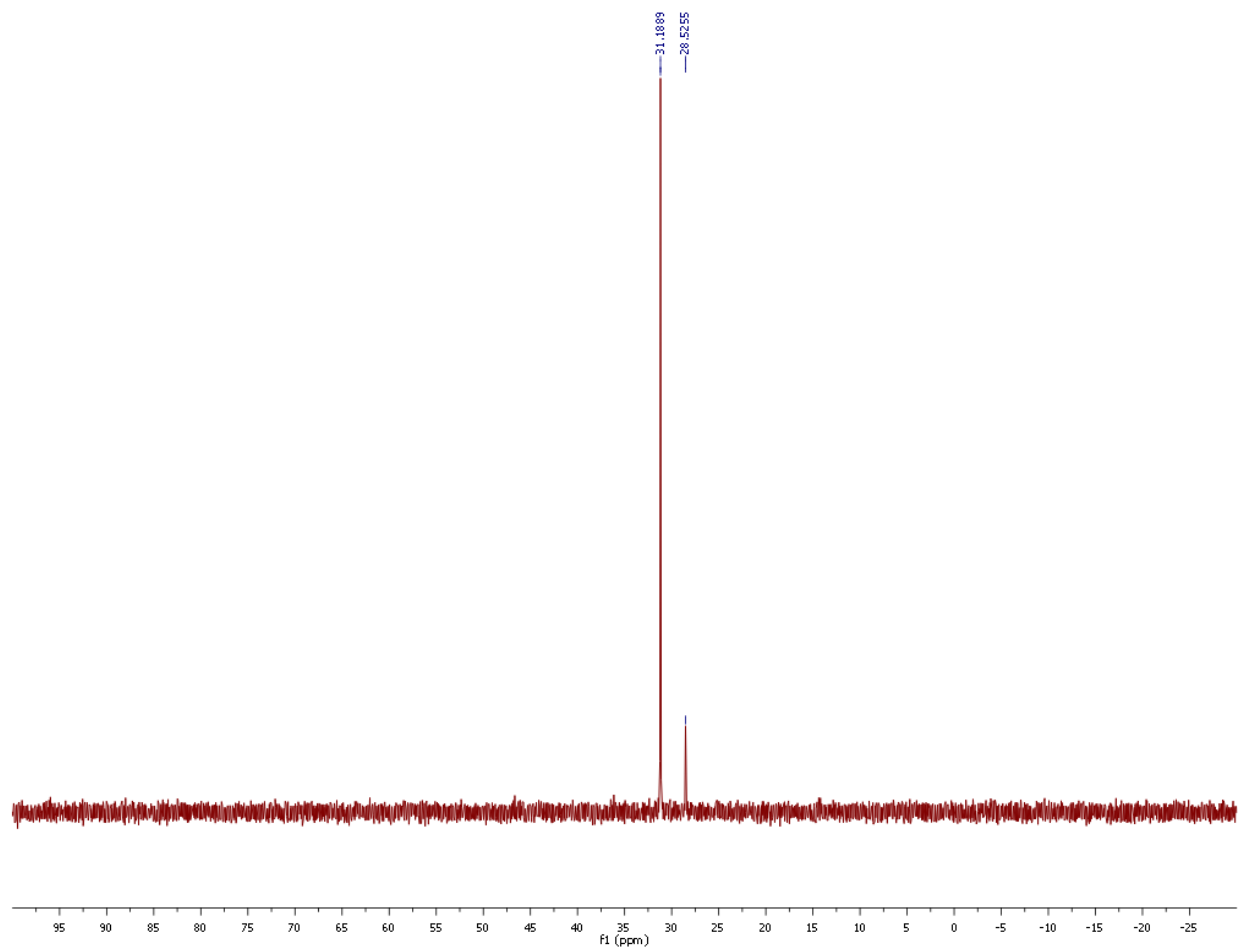

**Figure S21.**  $^{31}\text{P}$  NMR spectrum of **8b** in  $\text{C}_6\text{D}_6$  at 25 °C.



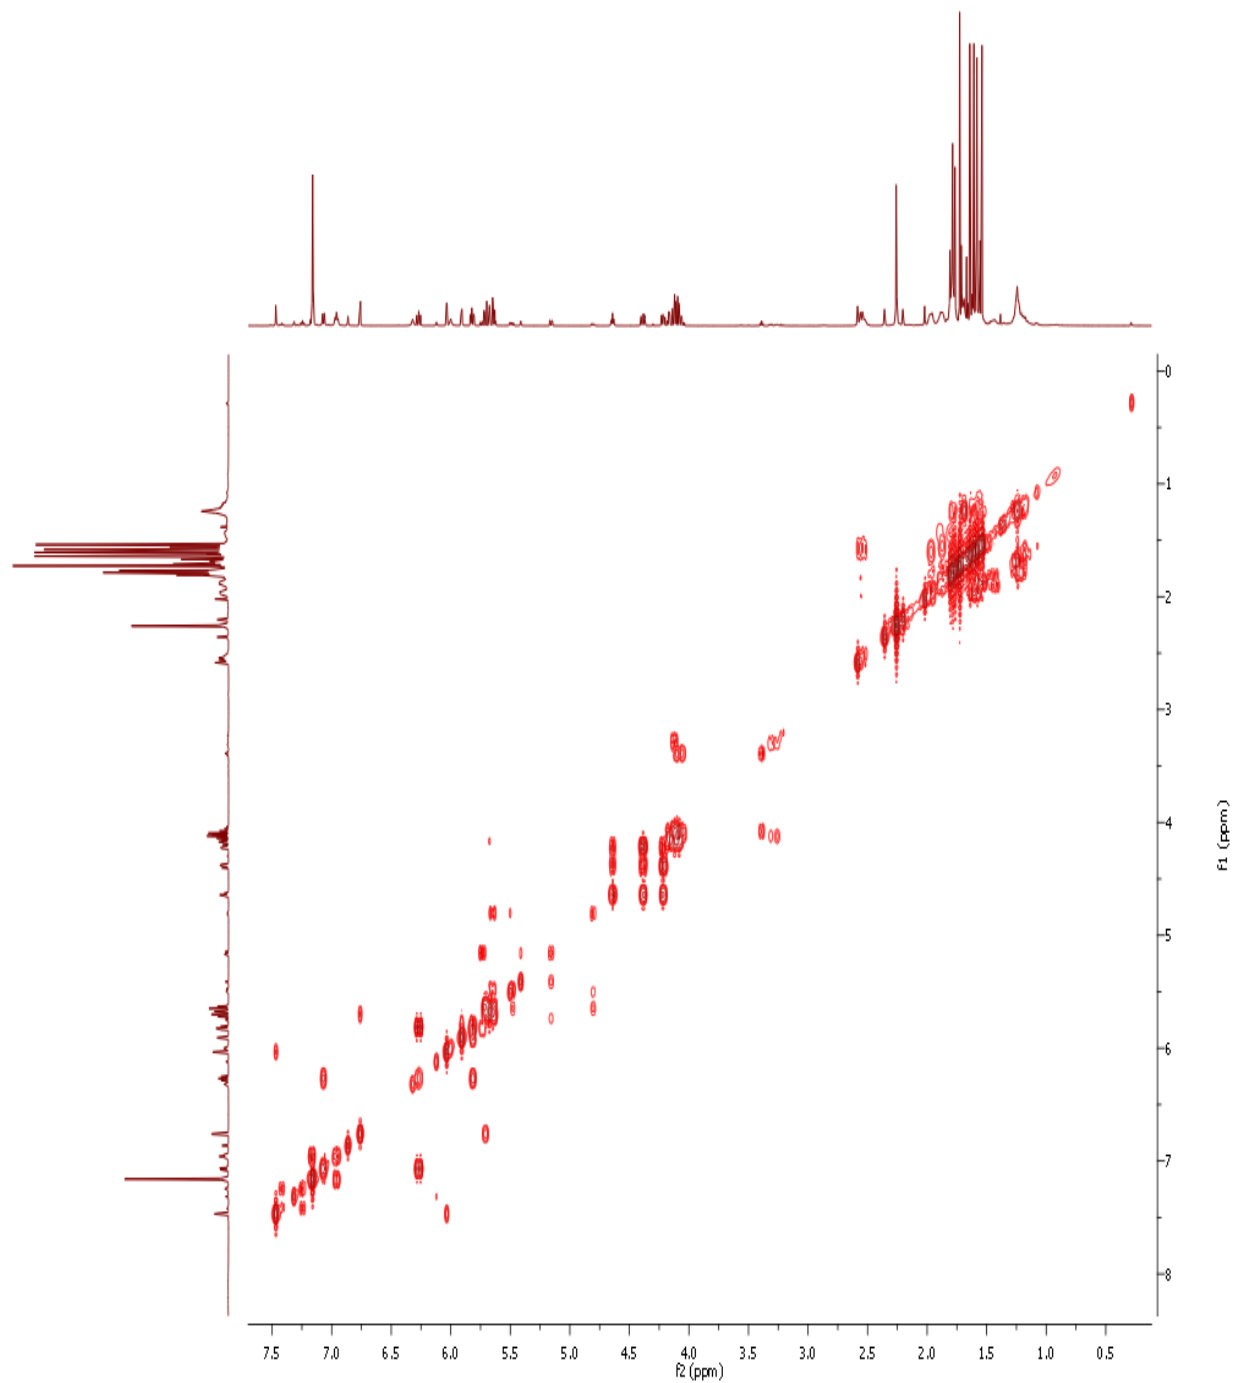

**Figure S22.** 600 MHz <sup>1</sup>H-<sup>1</sup>H gCOSY spectrum of **8b** in C<sub>6</sub>D<sub>6</sub> at 25 °C.

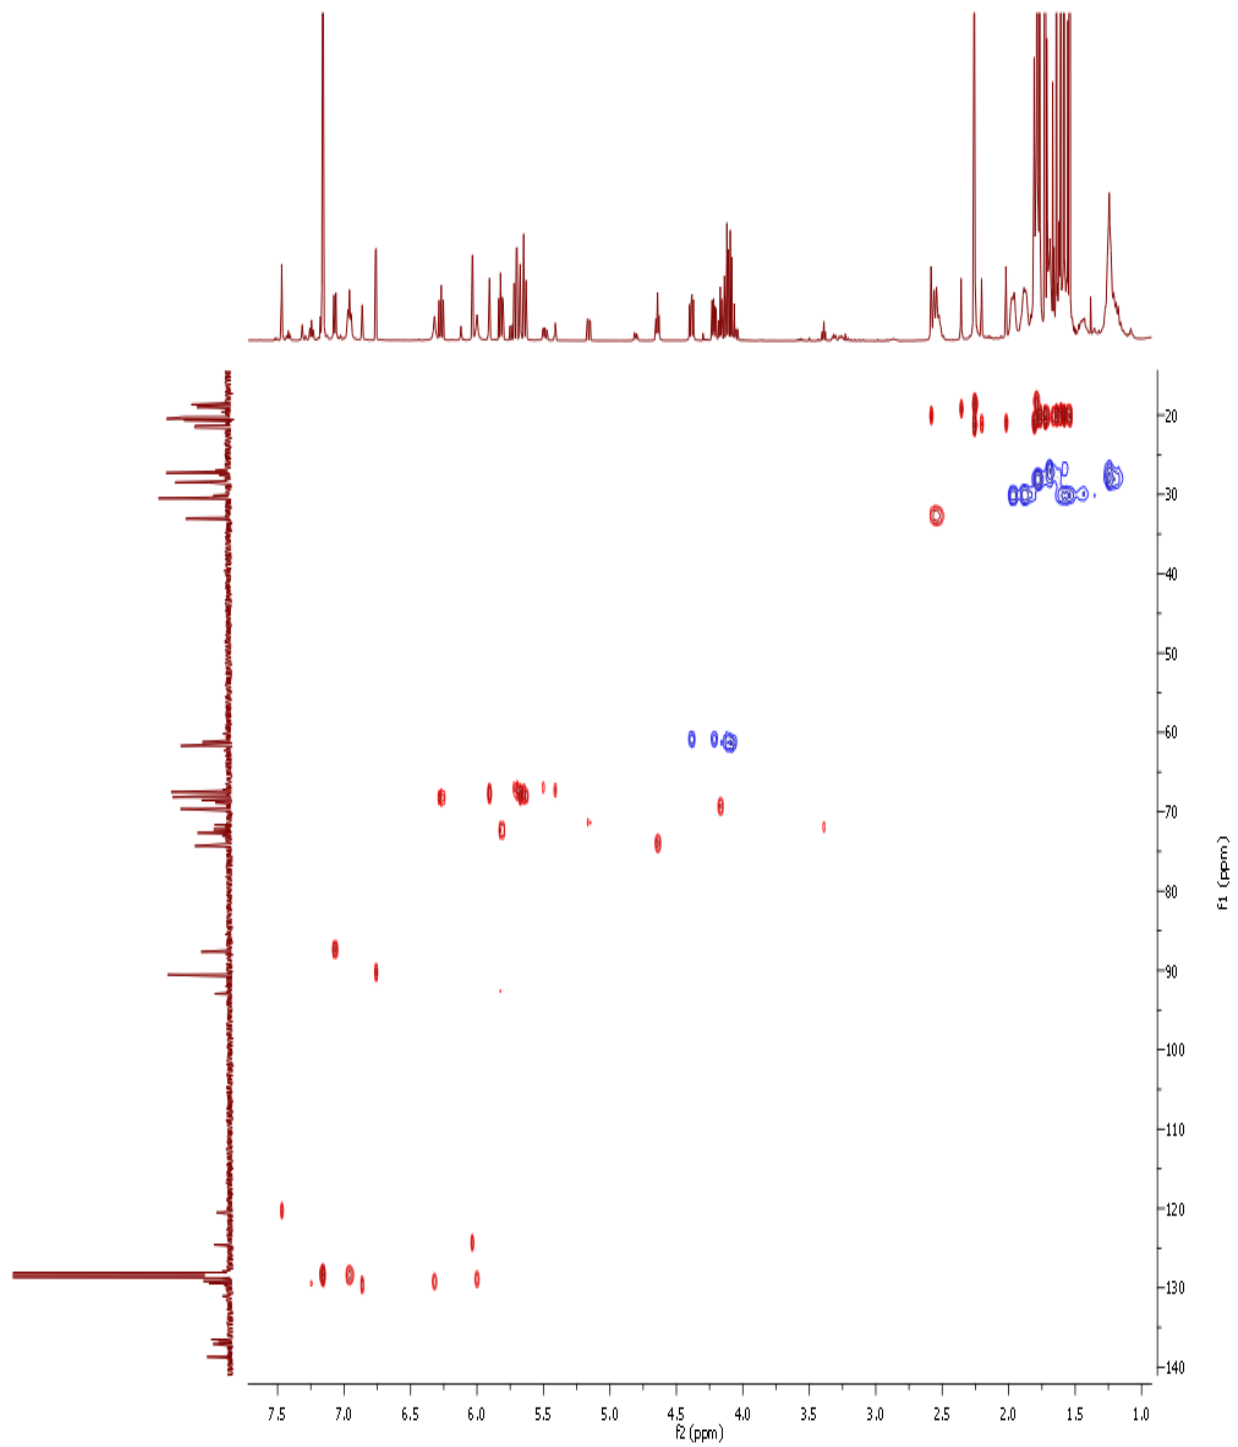

**Figure S23.** 600 MHz  $^1\text{H}$ - $^{13}\text{C}$  gHSQCad spectrum of **8b** in  $\text{C}_6\text{D}_6$  at 25 °C.

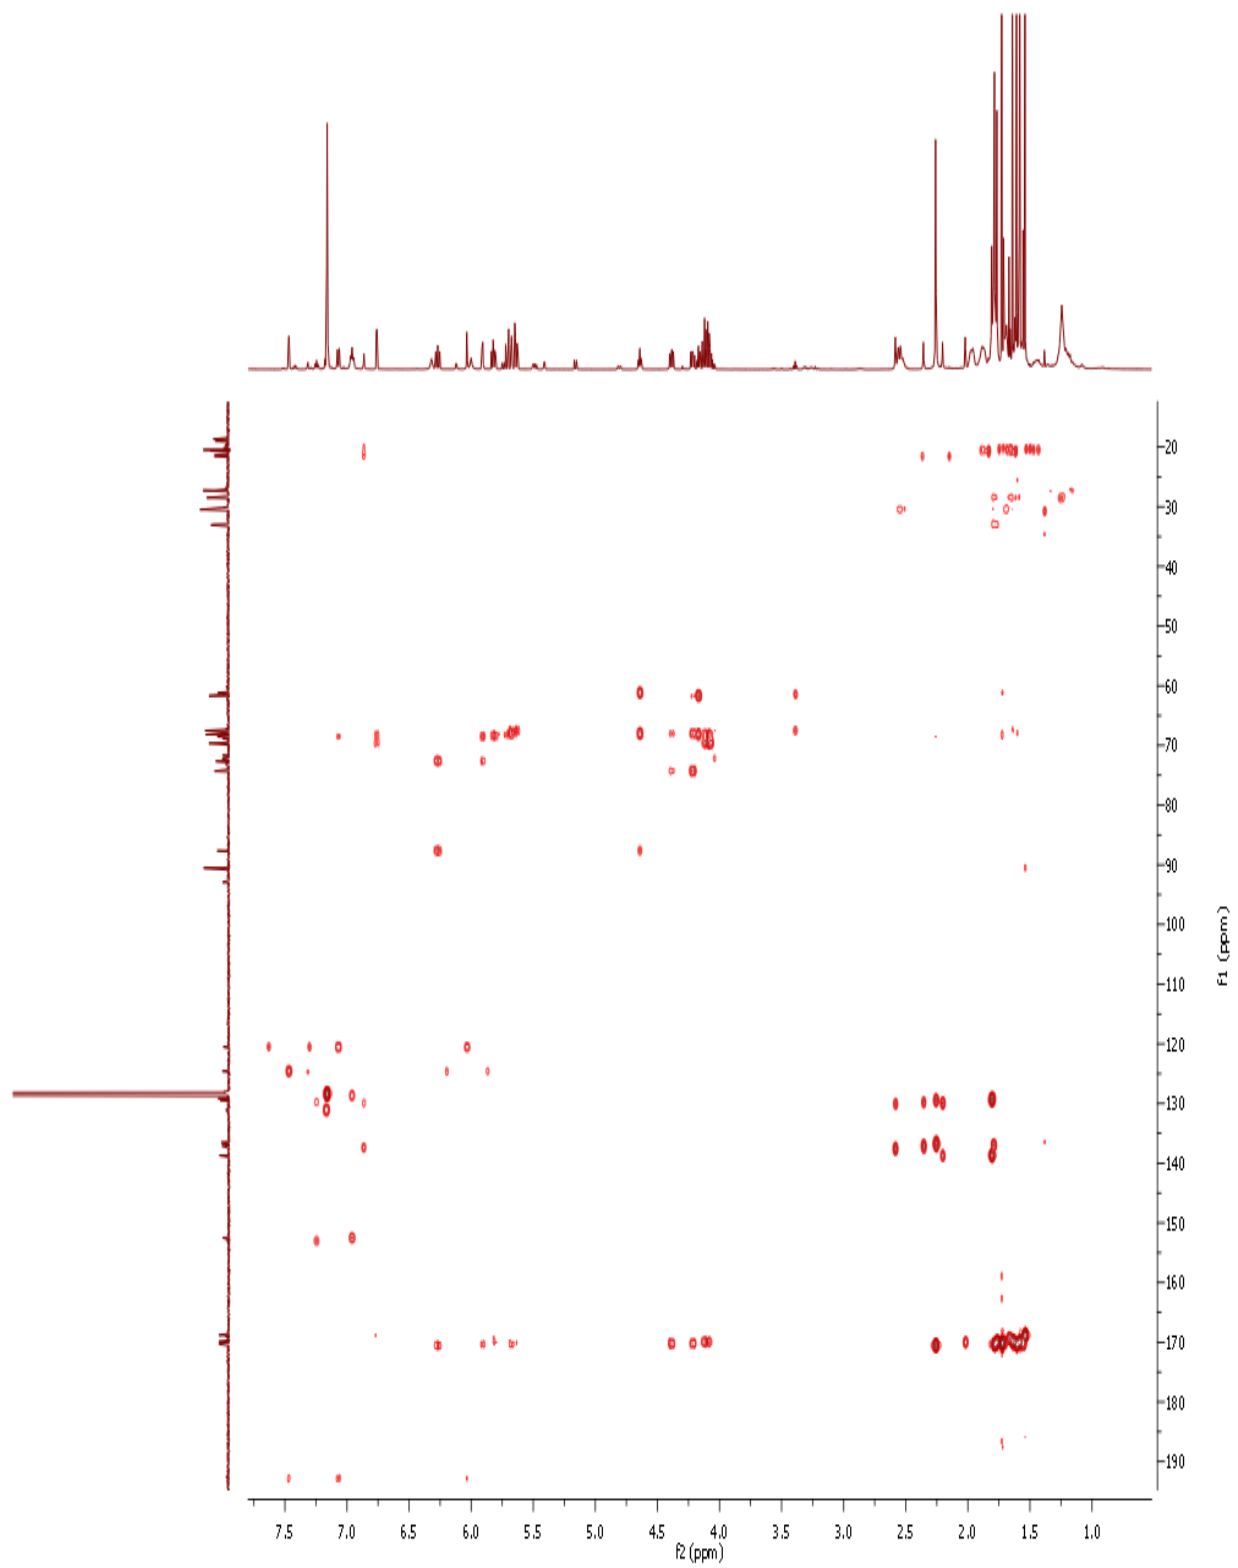

**Figure S24.** 600 MHz  $^1\text{H}$ - $^{13}\text{C}$  gHMBCad spectrum of **8b** in  $\text{C}_6\text{D}_6$  at 25 °C.

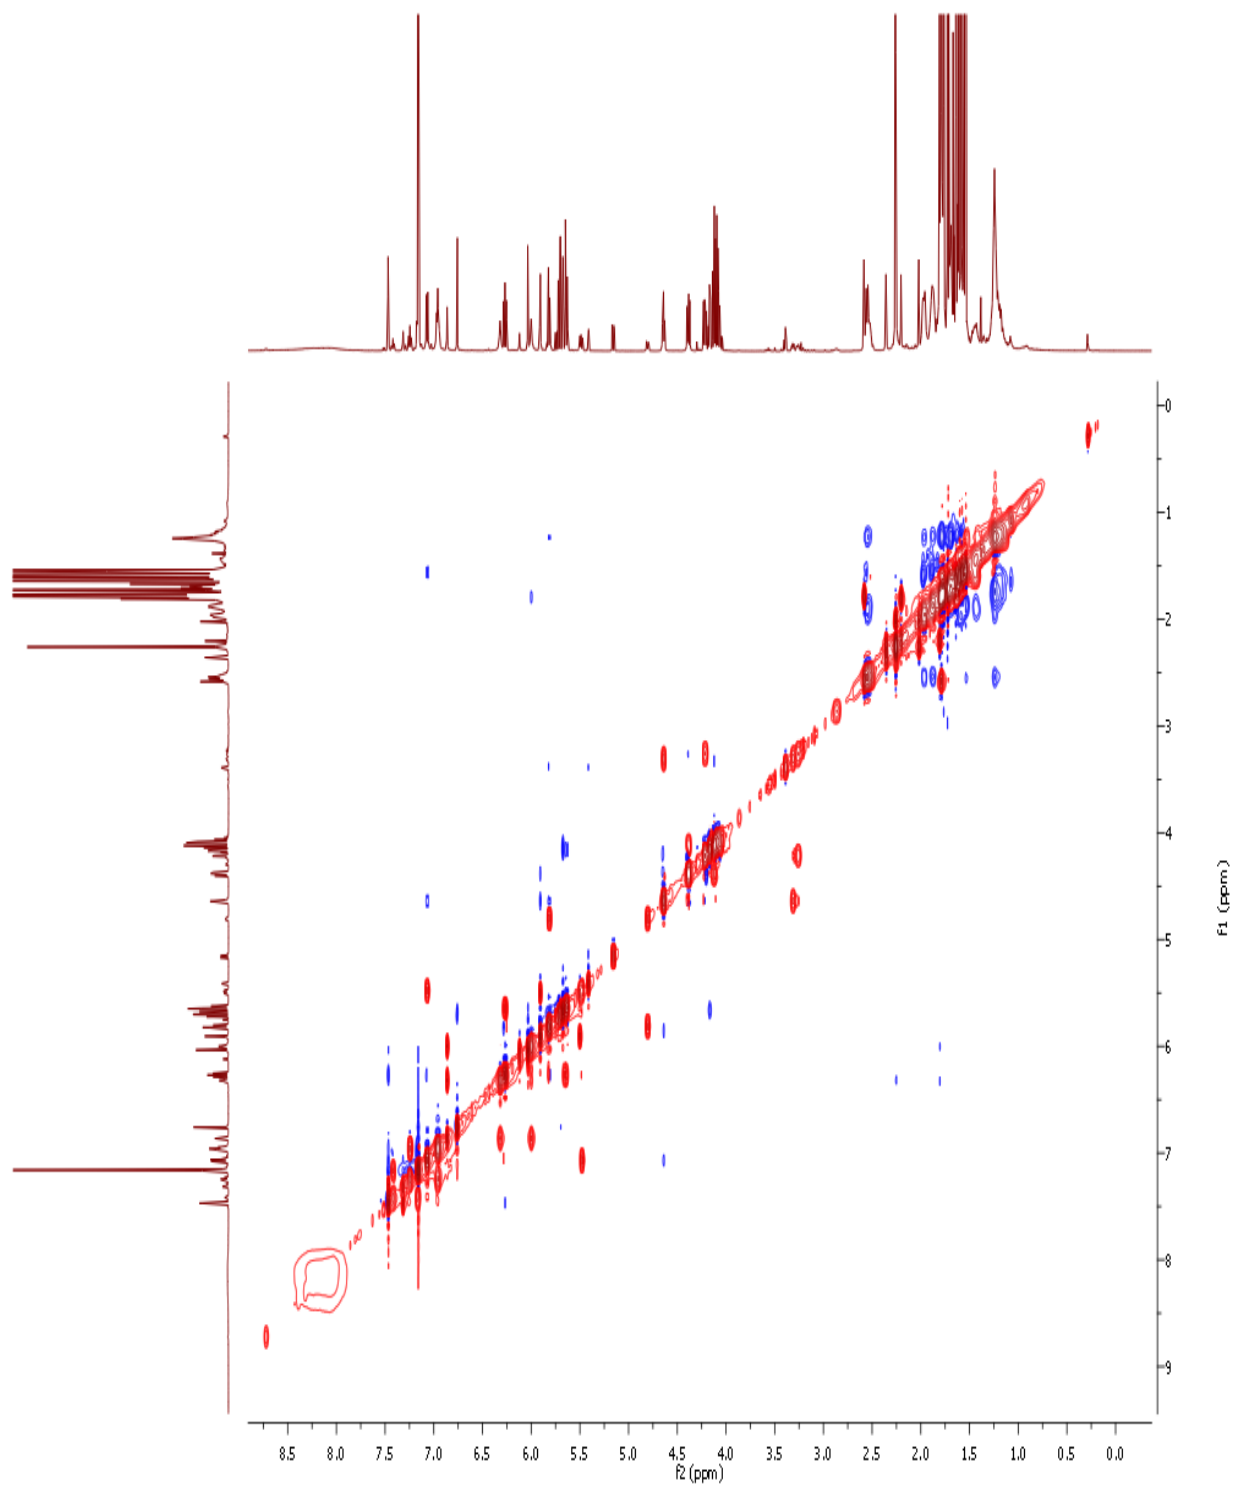

**Figure S25.** 600 MHz  $^1\text{H}$ - $^1\text{H}$  NOESY spectrum of **8b** in  $\text{C}_6\text{D}_6$  at 25 °C.

### Measurement of benzylidene rotation rate based on T<sub>1</sub>.

The first method used to measure the rotation rate about the benzylidene C – Ru bond was the spin saturation transfer method. This method entails the observation of one of the sites of an exchanging system while the other site is saturated with a selective inversion pulse. As a result of the chemical exchange, the intensity of the observed peak decreases until a new steady state is reached. The ratio of the intensity of this new steady state resonance to the original peak intensity is related to the T<sub>1</sub> of the observed resonance and the rate of chemical exchange by Eq. 1.<sup>7</sup>

$$M_{zA}(\infty) = M_{0A} \frac{T_A}{\tau_A + T_{1A}} \quad (1)$$

Rearranging Eq. 1 with  $k_A = 1/\tau_A$  and  $R_A = 1/T_{1A}$  yields Eq. 2.

$$\frac{M_{zA}(\infty)}{M_{0A}} = \frac{R_A}{R_A + k_A} \quad (2)$$

The T<sub>1</sub>'s were measured using the inversion recovery method and are shown in Table S1.

**Table S1.** Measured T<sub>1</sub>'s using inversion recovery of **8a** in C<sub>6</sub>D<sub>6</sub> at 25°C.

| Peak | Shift (ppm) | T <sub>1</sub> (s) | Error (s) |
|------|-------------|--------------------|-----------|
| 1    | 19.74       | 0.615              | 0.002     |
| 2    | 20.78       | 0.569              | 0.007     |

The VNMRj PRESAT pulse sequence was used to selectively invert the desired peak and an array of delay times (d1) was set up in order to determine the steady state intensity. A sample calculation is given below.

$$\frac{M_{zA}(\infty)}{M_{0A}} = 0.249 = \frac{1.75}{1.75 + k_A}$$

$$k_A = 5.28 \text{ s}^{-1} \text{ (reported value)}$$

### Measurement of benzylidene rotation rate using line shape analysis.

A lineshape analysis of the benzylidene rotation in **8a** was performed in order to obtain a more accurate estimate of  $\Delta G^\ddagger$ . The coalescence temperature could not be reached due to catalyst decomposition, however, a suitable temperature range from 12.5-73.1 °C was found in which there was no observable catalyst decomposition. To measure the rate of benzylidene rotation, **8a** was dissolved in ca. 0.6 mL of dry C<sub>6</sub>D<sub>6</sub> and placed into a J. Young tube inside of a glove box. The tube was sealed and removed from the box and placed inside the spectrometer where it was allowed to equilibrate at the appropriate temperature for ca. 10 min before acquisition. The probe was calibrated at each temperature according to the method described in the **General Information**. Each experiment was run with <sup>31</sup>P decoupling in order to simplify the line shape analysis of the resulting spectrum. These spectra, along with the overlaid fits, are shown in Figure S25. Experimental spectra were simulated using the MEXICO set of programs developed by Professor Alex Bain.<sup>8</sup> The non-iterative version of MEXICO was used through the SpinWorks (Ver. 3) NMR program which overlays the MEXICO simulation with the experimental spectrum and calculates an RMS value immediately.<sup>9</sup> Table S2 summarizes the fit parameters and results from each simulation.

**Table S2.** Simulation parameters and results from manual MEXICO fitting.

| Number | $\delta 1$ (ppm) | $\delta 2$ (ppm) | Temp (K) | Pop. 1 | Pop. 2 | T1 (s) | k (s <sup>-1</sup> ) | R <sup>2</sup> |
|--------|------------------|------------------|----------|--------|--------|--------|----------------------|----------------|
| 1      | 19.7429          | 20.7398          | 285.5    | 1      | 0.221  | 0.075  | 0.4                  | 0.016869       |
| 2      | 19.7573          | 20.7604          | 295.3    | 1      | 0.2227 | 0.1    | 0.91                 | 0.014485       |
| 3      | 19.7714          | 20.7793          | 305.3    | 1      | 0.2491 | 0.125  | 1.6                  | 0.016267       |
| 4      | 19.786           | 20.7987          | 315.4    | 1      | 0.2347 | 0.15   | 4.3                  | 0.021245       |
| 5      | 19.8006          | 20.8163          | 325.1    | 1      | 0.2575 | 0.175  | 11                   | 0.03155        |
| 6      | 19.815           | 20.8333          | 335.9    | 1      | 0.3759 | 0.2    | 24.5                 | 0.035247       |
| 7      | 19.8301          | 20.8387          | 346.1    | 1      | 0.2575 | 0.225  | 75                   | 0.132513       |

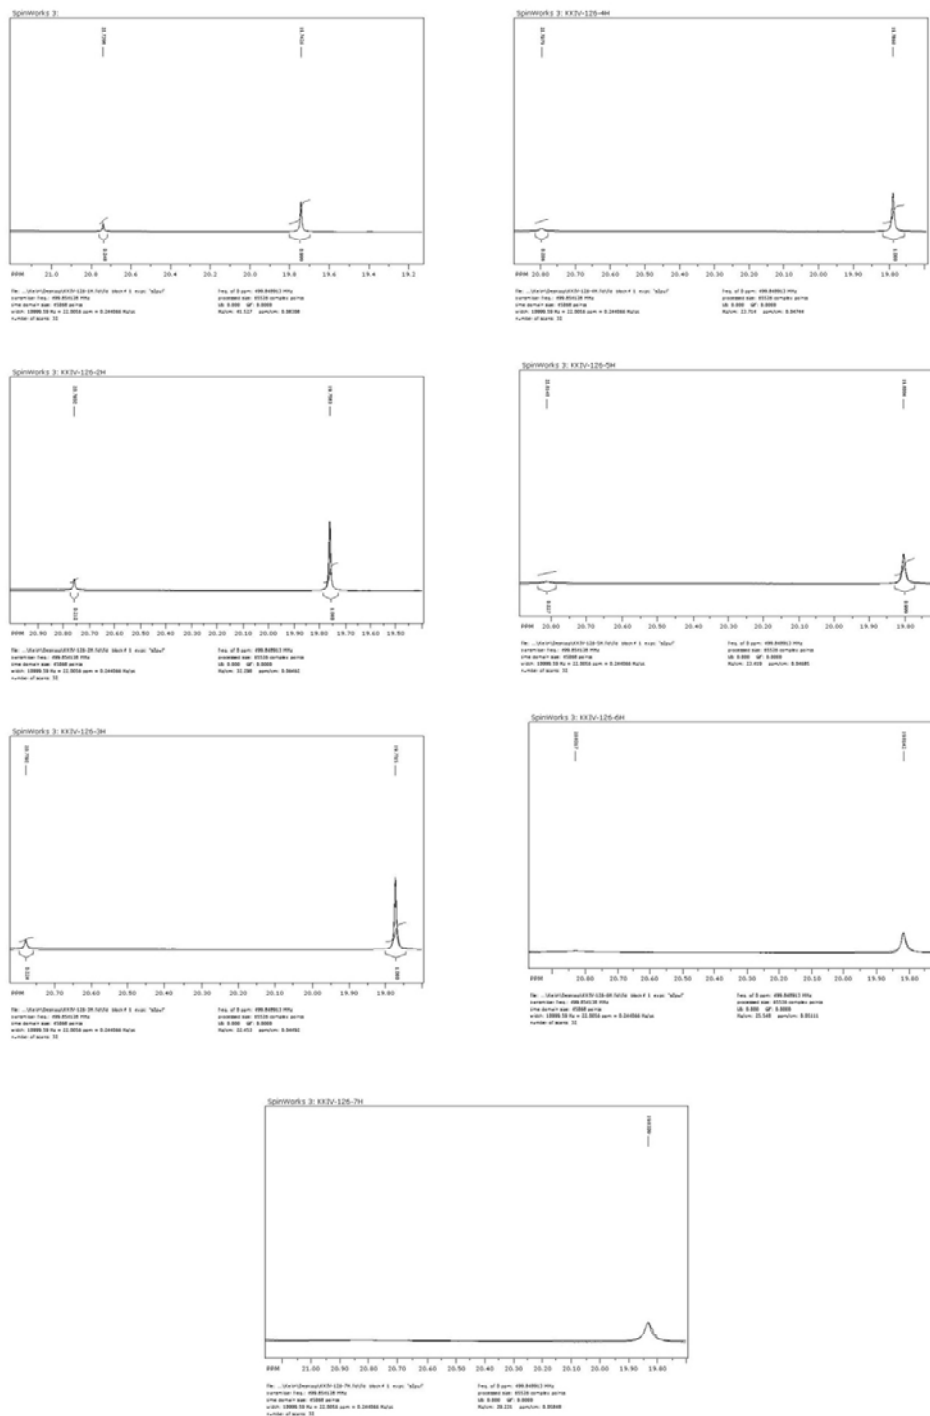

**Figure S26.** Experimental spectra and MEXICO fits of the benzylidene region of **8a** in C<sub>6</sub>D<sub>6</sub> at temperatures ranging from 285.5 K to 346.1 K.

## Eyring Plots and Error Analysis

According to the Activated Complex Theory of Henry Eyring,

$$k = \left( \frac{k_B T}{h} e^{\Delta S^\ddagger / R} \right) e^{-\Delta H^\ddagger / RT} \quad (3)$$

where  $k$  is the rate in  $s^{-1}$ ,  $k_B$  is Boltzmann's constant,  $h$  is Planck's constant,  $R$  is the gas constant, and  $T$  is the temperature in Kelvin. Eq. 3 can be re-worked to yield a linear equation which gives  $\Delta H^\ddagger$  as the slope and  $\Delta S^\ddagger$  as the intercept (Eq. 4).

$$R \ln \frac{hk}{k_B T} = \Delta S^\ddagger + \left( \frac{1}{T} \right) \Delta H^\ddagger \quad (4)$$

The uncertainty in the slope and intercept was determined directly from the output provided by the linear regression function of the NCSS statistical software package (shown below).<sup>10</sup>

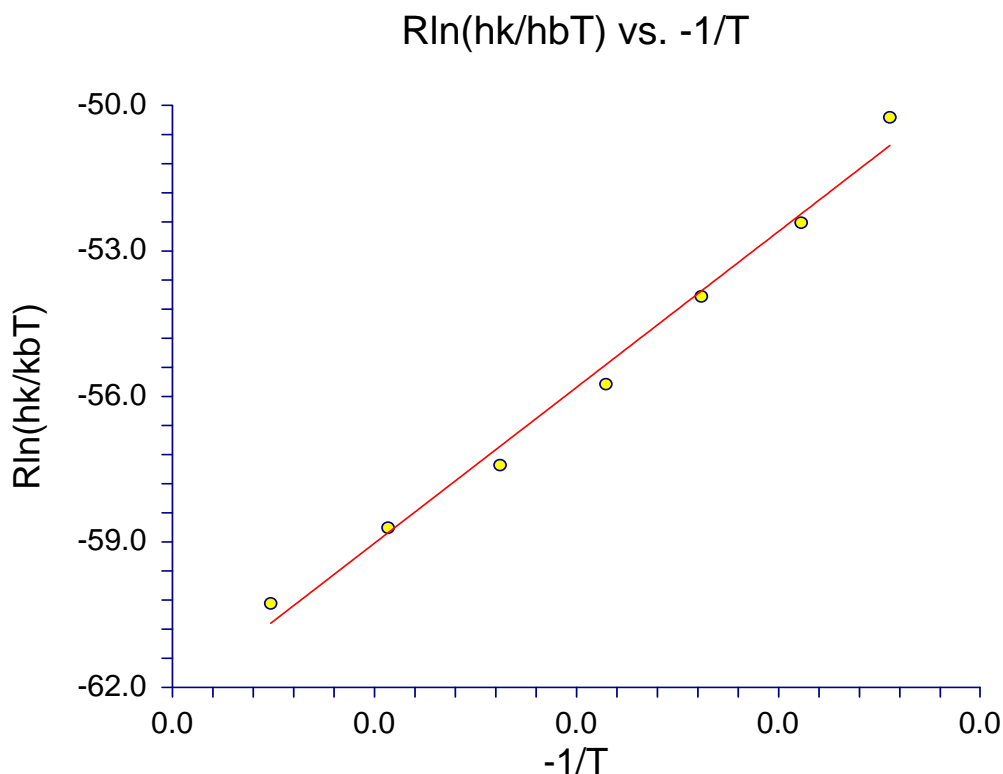

### Run Summary Section

| Parameter            | Value | Parameter               | Value |
|----------------------|-------|-------------------------|-------|
| Dependent Variable   | C2    | Rows Processed          | 7     |
| Independent Variable | C1    | Rows Used in Estimation | 7     |



|                    |            |                          |           |
|--------------------|------------|--------------------------|-----------|
| Frequency Variable | None       | Rows with X Missing      | 0         |
| Weight Variable    | None       | Rows with Freq Missing   | 0         |
| Intercept          | -4.4239    | Rows Prediction Only     | 0         |
| Slope              | 16060.7710 | Sum of Frequencies       | 7         |
| R-Squared          | 0.9885     | Sum of Weights           | 7.0000    |
| Correlation        | 0.9943     | Coefficient of Variation | -0.0075   |
| Mean Square Error  | 0.1747487  | Square Root of MSE       | 0.4180296 |

### Descriptive Statistics Section

| Parameter          | Dependent | Independent |
|--------------------|-----------|-------------|
| Variable           | C2        | C1          |
| Count              | 7         | 7           |
| Mean               | -55.5371  | -0.0032     |
| Standard Deviation | 3.5655    | 0.0002      |
| Minimum            | -60.2700  | -0.0035     |
| Maximum            | -50.2500  | -0.0029     |

### Regression Estimation Section

| Parameter                        | Intercept<br>B(0) | Slope<br>B(1) |
|----------------------------------|-------------------|---------------|
| Regression Coefficients          | -4.4239           | 16060.7710    |
| Lower 95% Confidence Limit       | -10.7621          | 14073.2819    |
| Upper 95% Confidence Limit       | 1.9143            | 18048.2602    |
| Standard Error                   | 2.4657            | 773.1670      |
| Standardized Coefficient         | 0.0000            | 0.9943        |
| T Value                          | -1.7942           | 20.7727       |
| Prob Level (T Test)              | 0.1327            | 0.0000        |
| Reject H0 (Alpha = 0.0500)       | No                | Yes           |
| Power (Alpha = 0.0500)           | 0.3086            | 1.0000        |
| Regression of Y on X             | -4.4239           | 16060.7710    |
| Inverse Regression from X on Y   | -3.8316           | 16246.8727    |
| Orthogonal Regression of Y and X | -3.8316           | 16246.8727    |

### Estimated Model

$(-4.42385374824523) + (16060.7710380801) * (C1)$

### Correlation and R-Squared Section

| Parameter                          | Pearson<br>Correlation<br>Coefficient | R-Squared | Spearman<br>Rank<br>Correlation<br>Coefficient |
|------------------------------------|---------------------------------------|-----------|------------------------------------------------|
| Estimated Value                    | 0.9943                                | 0.9885    | 1.0000                                         |
| Lower 95% Conf. Limit (r dist'n)   | 0.9532                                |           |                                                |
| Upper 95% Conf. Limit (r dist'n)   | 0.9989                                |           |                                                |
| Lower 95% Conf. Limit (Fisher's z) | 0.9599                                |           | 1.0000                                         |
| Upper 95% Conf. Limit (Fisher's z) | 0.9992                                |           | 1.0000                                         |
| Adjusted (Rbar)                    |                                       | 0.9863    |                                                |
| T-Value for H0: Rho = 0            | 20.7727                               | 20.7727   |                                                |
| Prob Level for H0: Rho = 0         | 0.0000                                | 0.0000    | 0.0000                                         |

### Analysis of Variance Section

| Source    | DF | Sum of<br>Squares | Mean<br>Square | F-Ratio | Prob<br>Level | Power<br>(5%) |
|-----------|----|-------------------|----------------|---------|---------------|---------------|
| Intercept | 1  | 21590.62          | 21590.62       |         |               |               |

|            |   |           |           |          |        |        |
|------------|---|-----------|-----------|----------|--------|--------|
| Slope      | 1 | 75.405    | 75.405    | 431.5053 | 0.0000 | 1.0000 |
| Error      | 5 | 0.8737436 | 0.1747487 |          |        |        |
| Adj. Total | 6 | 76.27874  | 12.71312  |          |        |        |
| Total      | 7 | 21666.9   |           |          |        |        |

$s = \text{Square Root}(0.1747487) = 0.4180296$

#### Summary Matrices

|             | X'X           | X'X           | X'Y      | X'X Inverse | X'X Inverse |
|-------------|---------------|---------------|----------|-------------|-------------|
| Index       | 0             | 1             | 2        | 0           | 1           |
| 0           | 7             | -2.227745E-02 | -388.76  | 34.79001    | 10886.8     |
| 1           | -2.227745E-02 | 7.119015E-05  | 1.241921 | 10886.8     | 3420839     |
| 2 (Y'Y)     |               |               | 21666.9  |             |             |
| Determinant |               | 2.046282E-06  |          |             | 488691.3    |

#### Variance - Covariance Matrix of Regression Coefficients

|       | VC(b)    | VC(b)    |
|-------|----------|----------|
| Index | 0        | 1        |
| 0     | 6.079509 | 1902.454 |
| 1     | 1902.454 | 597787.3 |

#### Tests of Assumptions Section

| Assumption/Test                              | Test Value | Prob Level | Is the Assumption Reasonable at the 0.2000 Level of Significance? |
|----------------------------------------------|------------|------------|-------------------------------------------------------------------|
| <b>Residuals follow Normal Distribution?</b> |            |            |                                                                   |
| Shapiro Wilk                                 | 0.9158     | 0.437789   | Yes                                                               |
| Anderson Darling                             | 0.3309     | 0.513157   | Yes                                                               |
| D'Agostino Skewness                          | 0.0000     |            |                                                                   |
| D'Agostino Kurtosis                          |            | 1.000000   | Yes                                                               |
| D'Agostino Omnibus                           |            |            |                                                                   |
| <b>Constant Residual Variance?</b>           |            |            |                                                                   |
| Modified Levene Test                         | 0.1252     | 0.737872   | Yes                                                               |
| <b>Relationship is a Straight Line?</b>      |            |            |                                                                   |
| Lack of Linear Fit F(0, 0) Test              | 0.0000     | 0.000000   | No                                                                |

The uncertainty in  $\Delta G^\ddagger$  was calculated using the error in the slope, intercept, and the off-diagonal component of the variance-covariance matrix (because  $\Delta H^\ddagger$  and  $\Delta S^\ddagger$  are correlated) created by NCSS.<sup>11</sup>

### Measurement of NHC rotation rate using line shape analysis.

The general procedure for the line shape analysis of the benzylidene rotation was followed with the exception of substituting  $\text{CD}_2\text{Cl}_2$  for  $\text{C}_6\text{D}_6$ .

**Table S3.** Simulation parameters and results from manual MEXICO fitting.

| Number | $\delta_1$ (ppm) | $\delta_2$ (ppm) | Temp (K) | Pop. 1 | Pop. 2 | T1 (s) | $k$ ( $\text{s}^{-1}$ ) | R2       |
|--------|------------------|------------------|----------|--------|--------|--------|-------------------------|----------|
| 1      | 19.0408          | 18.7754          | 199.3    | 1      | 0.82   | 0.04   | 0.004                   | 0.028476 |
| 2      | 19.0854          | 18.8064          | 206.8    | 1      | 0.73   | 0.05   | 0.01                    | 0.017213 |
| 3      | 19.172           | 18.8741          | 223.5    | 1      | 0.6    | 0.04   | 1.35                    | 0.018617 |
| 4      | 19.2137          | 18.9127          | 234.6    | 1      | 0.65   | 0.04   | 29                      | 0.044761 |
| 5      | 19.2401          | 18.954           | 241.8    | 1      | 0.7    | 0.03   | 75                      | 0.09729  |
| 6      | 19.0408          | 18.7754          | 272      | 1      | 0.65   | 0.04   | 1454                    | 0.016645 |

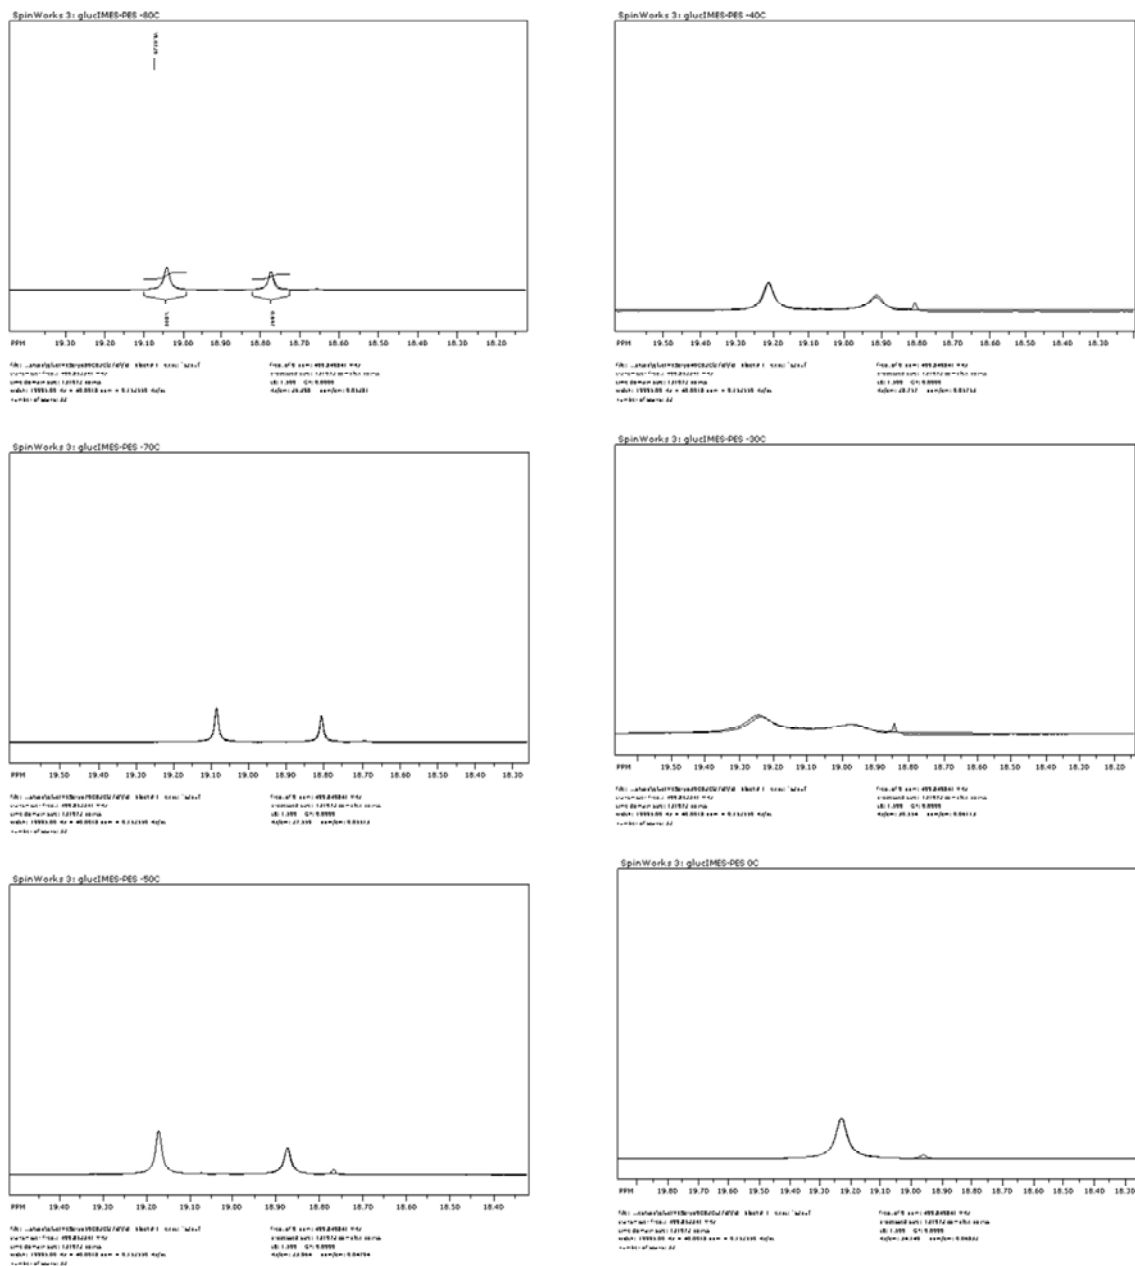

**Figure S27.** Experimental spectra and MEXICO fits of the benzylidene region of **8a** in  $\text{CD}_2\text{Cl}_2$  at temperatures ranging from 199.3 K to 272 K.

### Rln(hk/kBT) vs. -1/T

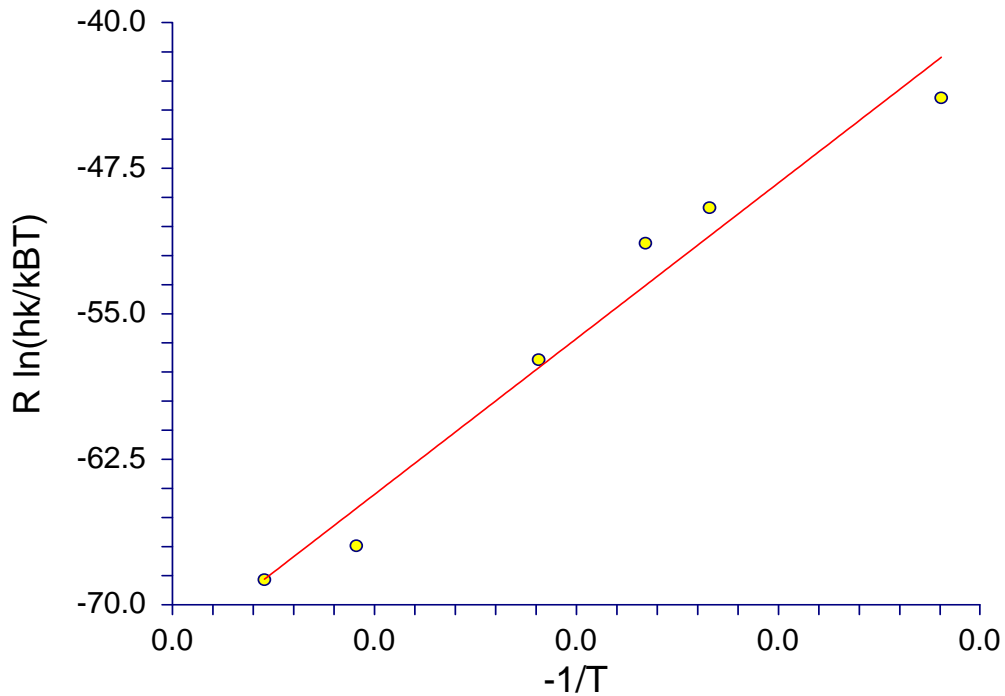

#### Run Summary Section

| Parameter            | Value      | Parameter                | Value    |
|----------------------|------------|--------------------------|----------|
| Dependent Variable   | C2         | Rows Processed           | 6        |
| Independent Variable | C1         | Rows Used in Estimation  | 6        |
| Frequency Variable   | None       | Rows with X Missing      | 0        |
| Weight Variable      | None       | Rows with Freq Missing   | 0        |
| Intercept            | 31.9226    | Rows Prediction Only     | 0        |
| Slope                | 20050.1186 | Sum of Frequencies       | 6        |
| R-Squared            | 0.9694     | Sum of Weights           | 6.0000   |
| Correlation          | 0.9846     | Coefficient of Variation | -0.0345  |
| Mean Square Error    | 3.775506   | Square Root of MSE       | 1.943066 |

#### Descriptive Statistics Section

| Parameter          | Dependent | Independent |
|--------------------|-----------|-------------|
| Variable           | C2        | C1          |
| Count              | 6         | 6           |
| Mean               | -56.3050  | -0.0044     |
| Standard Deviation | 9.9302    | 0.0005      |
| Minimum            | -68.7100  | -0.0050     |
| Maximum            | -43.8800  | -0.0037     |

#### Regression Estimation Section

| Intercept | Slope      |
|-----------|------------|
| 31.9226   | 20050.1186 |

| Parameter                        | B(0)    | B(1)       |
|----------------------------------|---------|------------|
| Regression Coefficients          | 31.9226 | 20050.1186 |
| Lower 95% Confidence Limit       | 10.0398 | 15102.4055 |
| Upper 95% Confidence Limit       | 53.8054 | 24997.8317 |
| Standard Error                   | 7.8816  | 1782.0317  |
| Standardized Coefficient         | 0.0000  | 0.9846     |
| T Value                          | 4.0503  | 11.2513    |
| Prob Level (T Test)              | 0.0155  | 0.0004     |
| Reject H0 (Alpha = 0.0500)       | Yes     | Yes        |
| Power (Alpha = 0.0500)           | 0.8515  | 1.0000     |
| Regression of Y on X             | 31.9226 | 20050.1186 |
| Inverse Regression from X on Y   | 34.7104 | 20683.6584 |
| Orthogonal Regression of Y and X | 34.7104 | 20683.6584 |

**Notes:**

The above report shows the least-squares estimates of the intercept and slope followed by the corresponding standard errors, confidence intervals, and hypothesis tests. Note that these results are based on several assumptions that should be validated before they are used.

**Estimated Model**

$$(31.9226028569538) + (20050.1185962279) * (C1)$$

**Analysis of Variance Section**

| Source     | DF | Sum of Squares | Mean Square | F-Ratio  | Prob Level | Power (5%) |
|------------|----|----------------|-------------|----------|------------|------------|
| Intercept  | 1  | 19021.52       | 19021.52    |          |            |            |
| Slope      | 1  | 477.9453       | 477.9453    | 126.5911 | 0.0004     | 1.0000     |
| Error      | 4  | 15.10202       | 3.775506    |          |            |            |
| Adj. Total | 5  | 493.0474       | 98.60947    |          |            |            |
| Total      | 6  | 19514.57       |             |          |            |            |

$$s = \text{Square Root}(3.775506) = 1.943066$$

**Notes:**

The above report shows the F-Ratio for testing whether the slope is zero, the degrees of freedom, and the mean square error. The mean square error, which estimates the variance of the residuals, is used extensively in the calculation of hypothesis tests and confidence intervals.

**Tests of Assumptions Section**

| Assumption/Test                              | Test Value | Prob Level | Is the Assumption Reasonable at the 0.2000 Level of Significance? |
|----------------------------------------------|------------|------------|-------------------------------------------------------------------|
| <b>Residuals follow Normal Distribution?</b> |            |            |                                                                   |
| Shapiro Wilk                                 | 0.9212     | 0.514354   | Yes                                                               |
| Anderson Darling                             | 0.3146     | 0.544607   | Yes                                                               |
| D'Agostino Skewness                          | 0.0000     |            |                                                                   |
| D'Agostino Kurtosis                          |            | 1.000000   | Yes                                                               |
| D'Agostino Omnibus                           |            |            |                                                                   |
| <b>Constant Residual Variance?</b>           |            |            |                                                                   |
| Modified Levene Test                         | 0.2717     | 0.629714   | Yes                                                               |

### Relationship is a Straight Line?

Lack of Linear Fit F(0, 0) Test      0.0000      0.000000      No

$\Delta H^\ddagger = 20.1 \pm 1.8 \text{ kcal/mol}$  (reported value)

$\Delta S^\ddagger = 31.9 \pm 7.9 \text{ e.u.}$  (reported value)

### References

- (1) Love, J.A.; Morgan, J.P.; Trnka, T.M.; Grubbs, R.H., *Angew. Chem. Int. Ed.* **2002**, *41*, 4035.
- (2) [www.mestrelab.com](http://www.mestrelab.com)
- (3) Berlin, J. M.; Goldberg, S. D.; Grubbs, R. H. *Angew. Chem. Int. Ed.* **2006**, *45*, 7591-7595.
- (4) Czechura, P.; Tam, R. Y.; Dimitrijevic, E.; Murphy, A. V.; Ben, R. N. *J. Am. Chem. Soc.* **2008**, *130*, 2928-2929.
- (5) Tewes, F.; Schlecker, A.; Harms, K.; Glorius, F. *J. Organomet. Chem.* **2007**, *692*, 4593-4602.
- (6) Ketz, B. E.; Cole, A. P.; Waymouth, R. M. *Organometallics* **2004**, *23*, 2835-2837.
- (7) Sandström, J.; *Dynamic NMR Spectroscopy*, Academic Press Inc.: New York, New York, 1982; pp. 53-54.
- (8) <http://chemistry.mcmaster.ca/faculty/bain/>
- (9) Marat, Kirk. SpinWorks.  
<http://www.umanitoba.ca/chemistry/nmr/spinworks/index.html>
- (10) <http://www.ness.com>
- (11) Anderson, D. R.; Hickstein, D. D.; O'Leary, D. J.; Grubbs, R. H. *J. Am. Chem. Soc.* **2006**, *128*, 8386.
